# Supplementary material for: Sm-p80-based schistosomiasis vaccine mediated epistatic interactions identified potential immune signatures for vaccine efficacy in mice and baboons
Source: PubMed Central journal article supplement (PMC5305113; doi:10.1371/journal.pone.0171677), 2017-02-13
Supplement: pone.0171677.s007.pdf [file pone.0171677.s007.pdf]

**Supplementary Dataset 6**

| <b>Gene</b>   | <b>Primer sequence</b>                                                                       |
|---------------|----------------------------------------------------------------------------------------------|
| <i>CDK1</i>   | Forward: 5'-AAG CAG TTG GGA TGA GAA GG-3'<br>Reverse: 5'-CCC TGA TCT CTA GCT GTG AAA C-3'    |
| <i>CSF2</i>   | Forward: 5'-AAT GGT GAA GAC CGT GTC AG-3'<br>Reverse: 5'-GGG CAT GGT GAT TTC CTT GTA-3'      |
| <i>FOS</i>    | Forward: 5'-GAT GGC TCC CTA CAG AAG AAA C-3'<br>Reverse: 5'-GGA TTC TCC GTT TCT CTT CCT C-3' |
| <i>GAPDH</i>  | Forward: 5'-AAC AGC AAC TCC CAC TCT TC-3'<br>Reverse: 5'-CCT GTT GCT GTA GCC GTA TT-3'       |
| <i>HEBP1</i>  | Forward: 5'-GAT GGC TCC CTA CAG AAG AAA C-3'<br>Reverse: 5'-GTT CCT CGA TCT TCA CAC TCT C-3' |
| <i>S100A8</i> | Forward: 5'-GTG ACA ATG CCG TCT GAA CT-3'<br>Reverse: 5'-GGG CAT GGT GAT TTC CTT GTA-3'      |
| <i>STAT1</i>  | Forward: 5'-CTG GAG GAG TTG GAA CAG AAA-3'<br>Reverse: 5'-CTG AAT GAG CTG CTG GAA GA-3'      |
| <i>TLR4</i>   | Forward: 5'-GCT TAC ACC ACC TCT CAA ACT-3'<br>Reverse: 5'-ACA GCC ACC AGA TTC TCT AAA C-3'   |
