# Supplementary material for: Sm-p80-based schistosomiasis vaccine mediated epistatic interactions identified potential immune signatures for vaccine efficacy in mice and baboons
Source: PubMed Central journal article supplement (PMC5305113; doi:10.1371/journal.pone.0171677), 2017-02-13

S1 Fig

Immune Related Genes

A

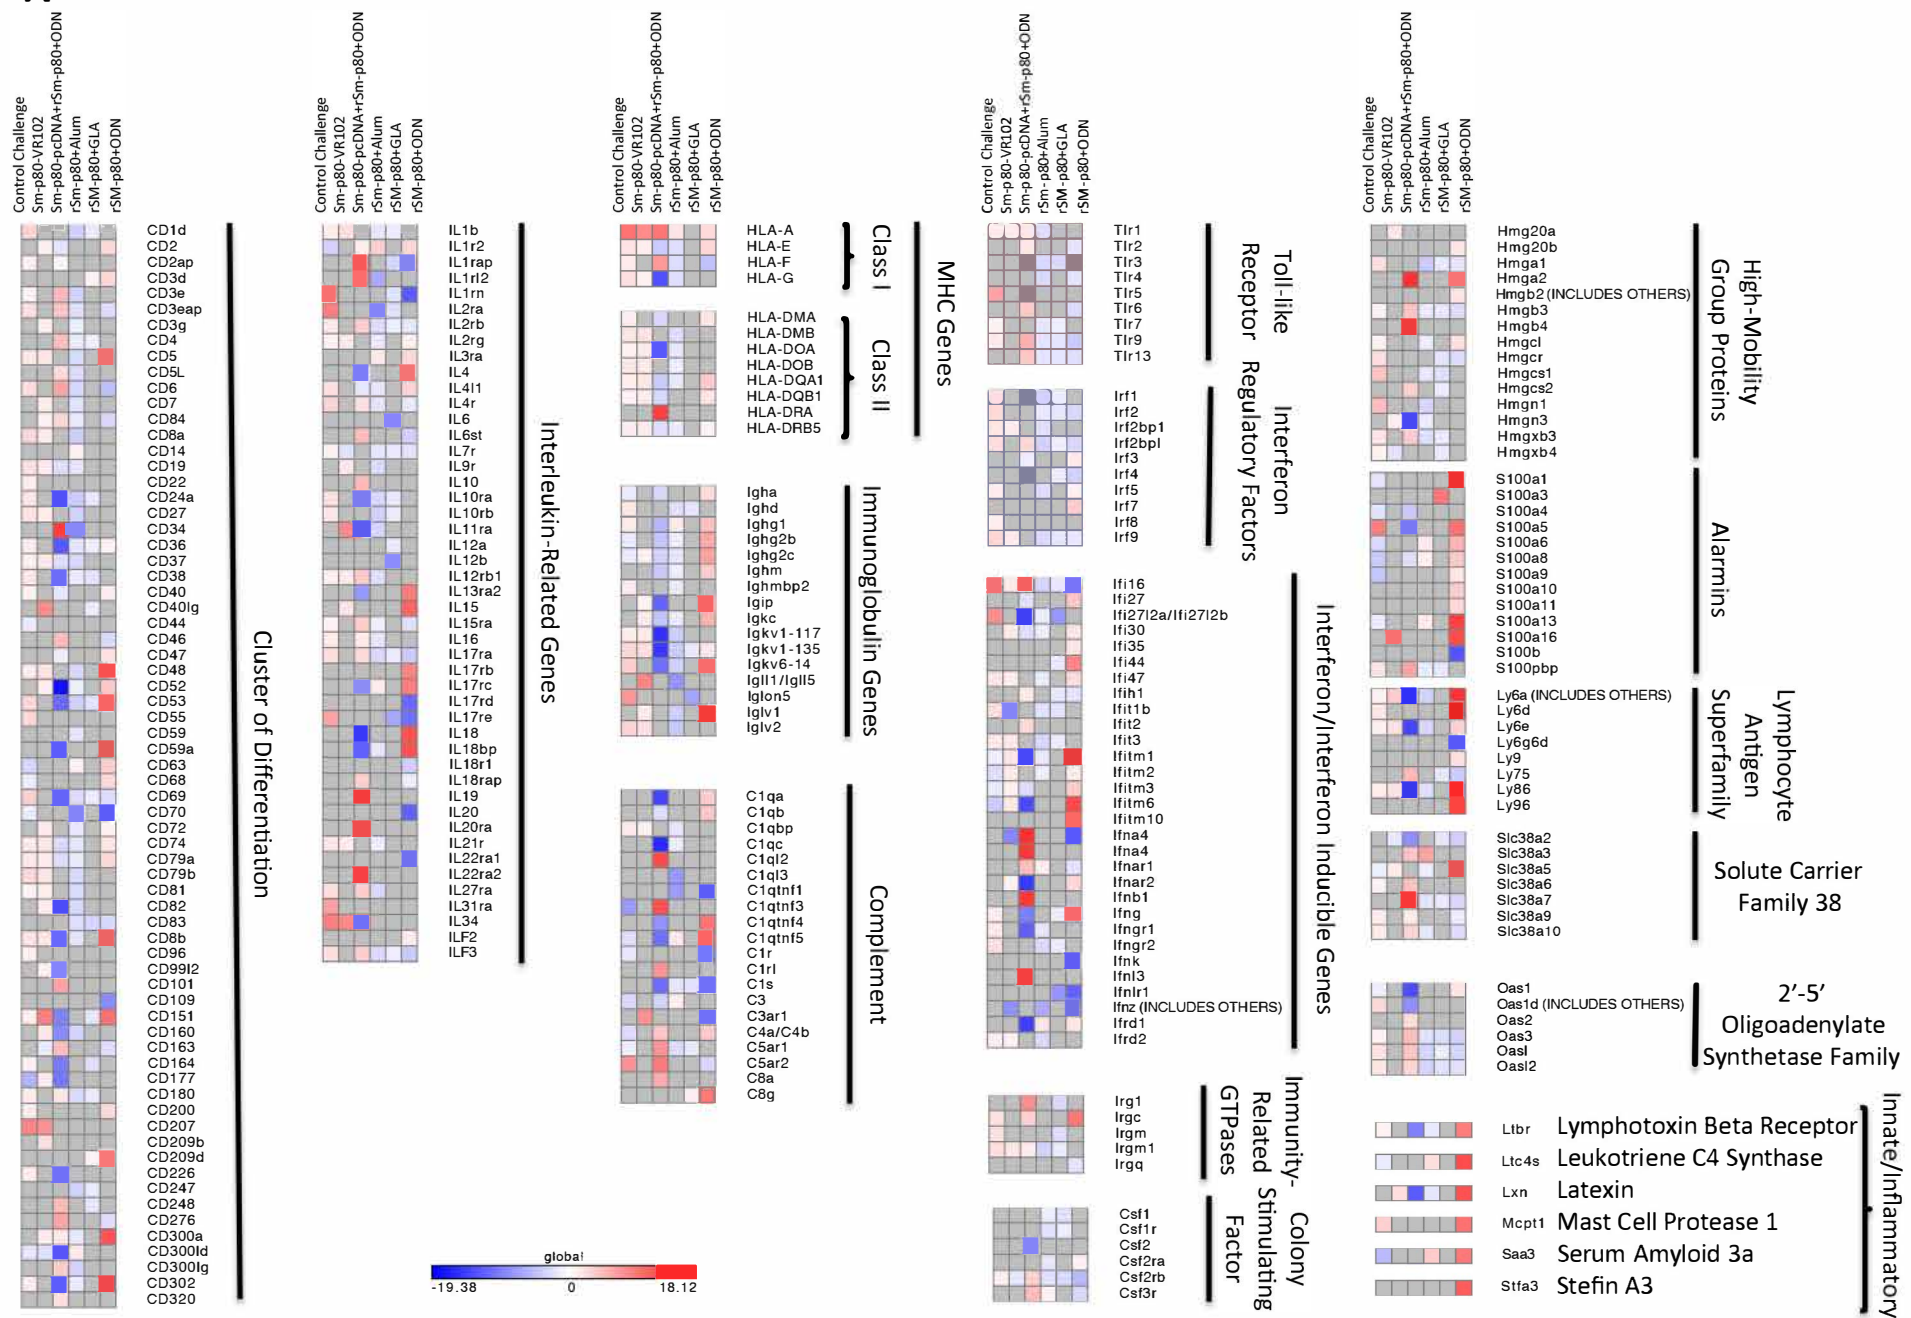

**B**

# Metabolic and Cellular Process Genes

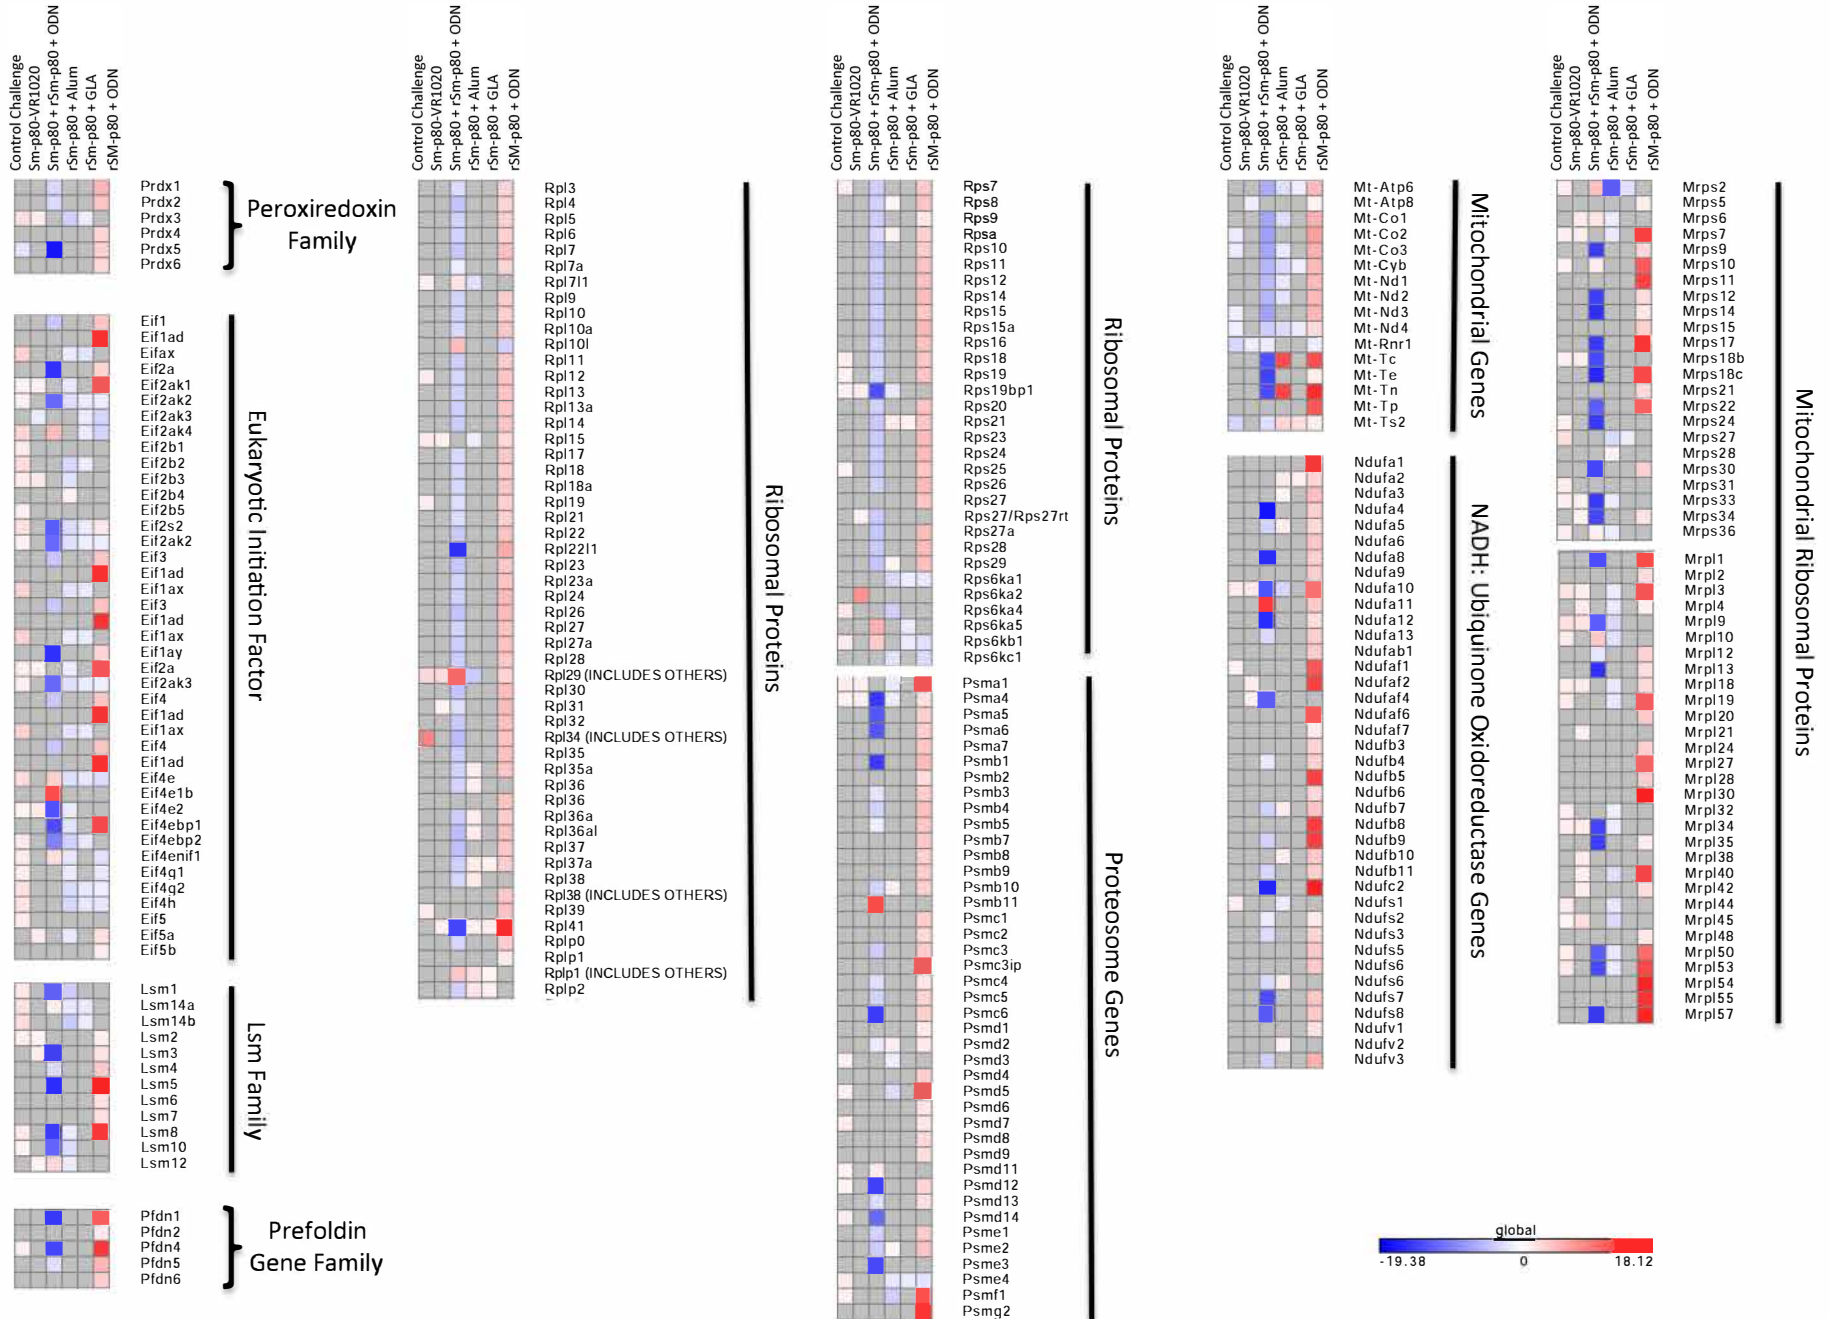

Supplement: pone.0171677.s008.pdf [file pone.0171677.s008.pdf]
