# Supplementary material for: Sm-p80-based schistosomiasis vaccine mediated epistatic interactions identified potential immune signatures for vaccine efficacy in mice and baboons
Source: PubMed Central journal article supplement (PMC5305113; doi:10.1371/journal.pone.0171677), 2017-02-13

S5 Fig

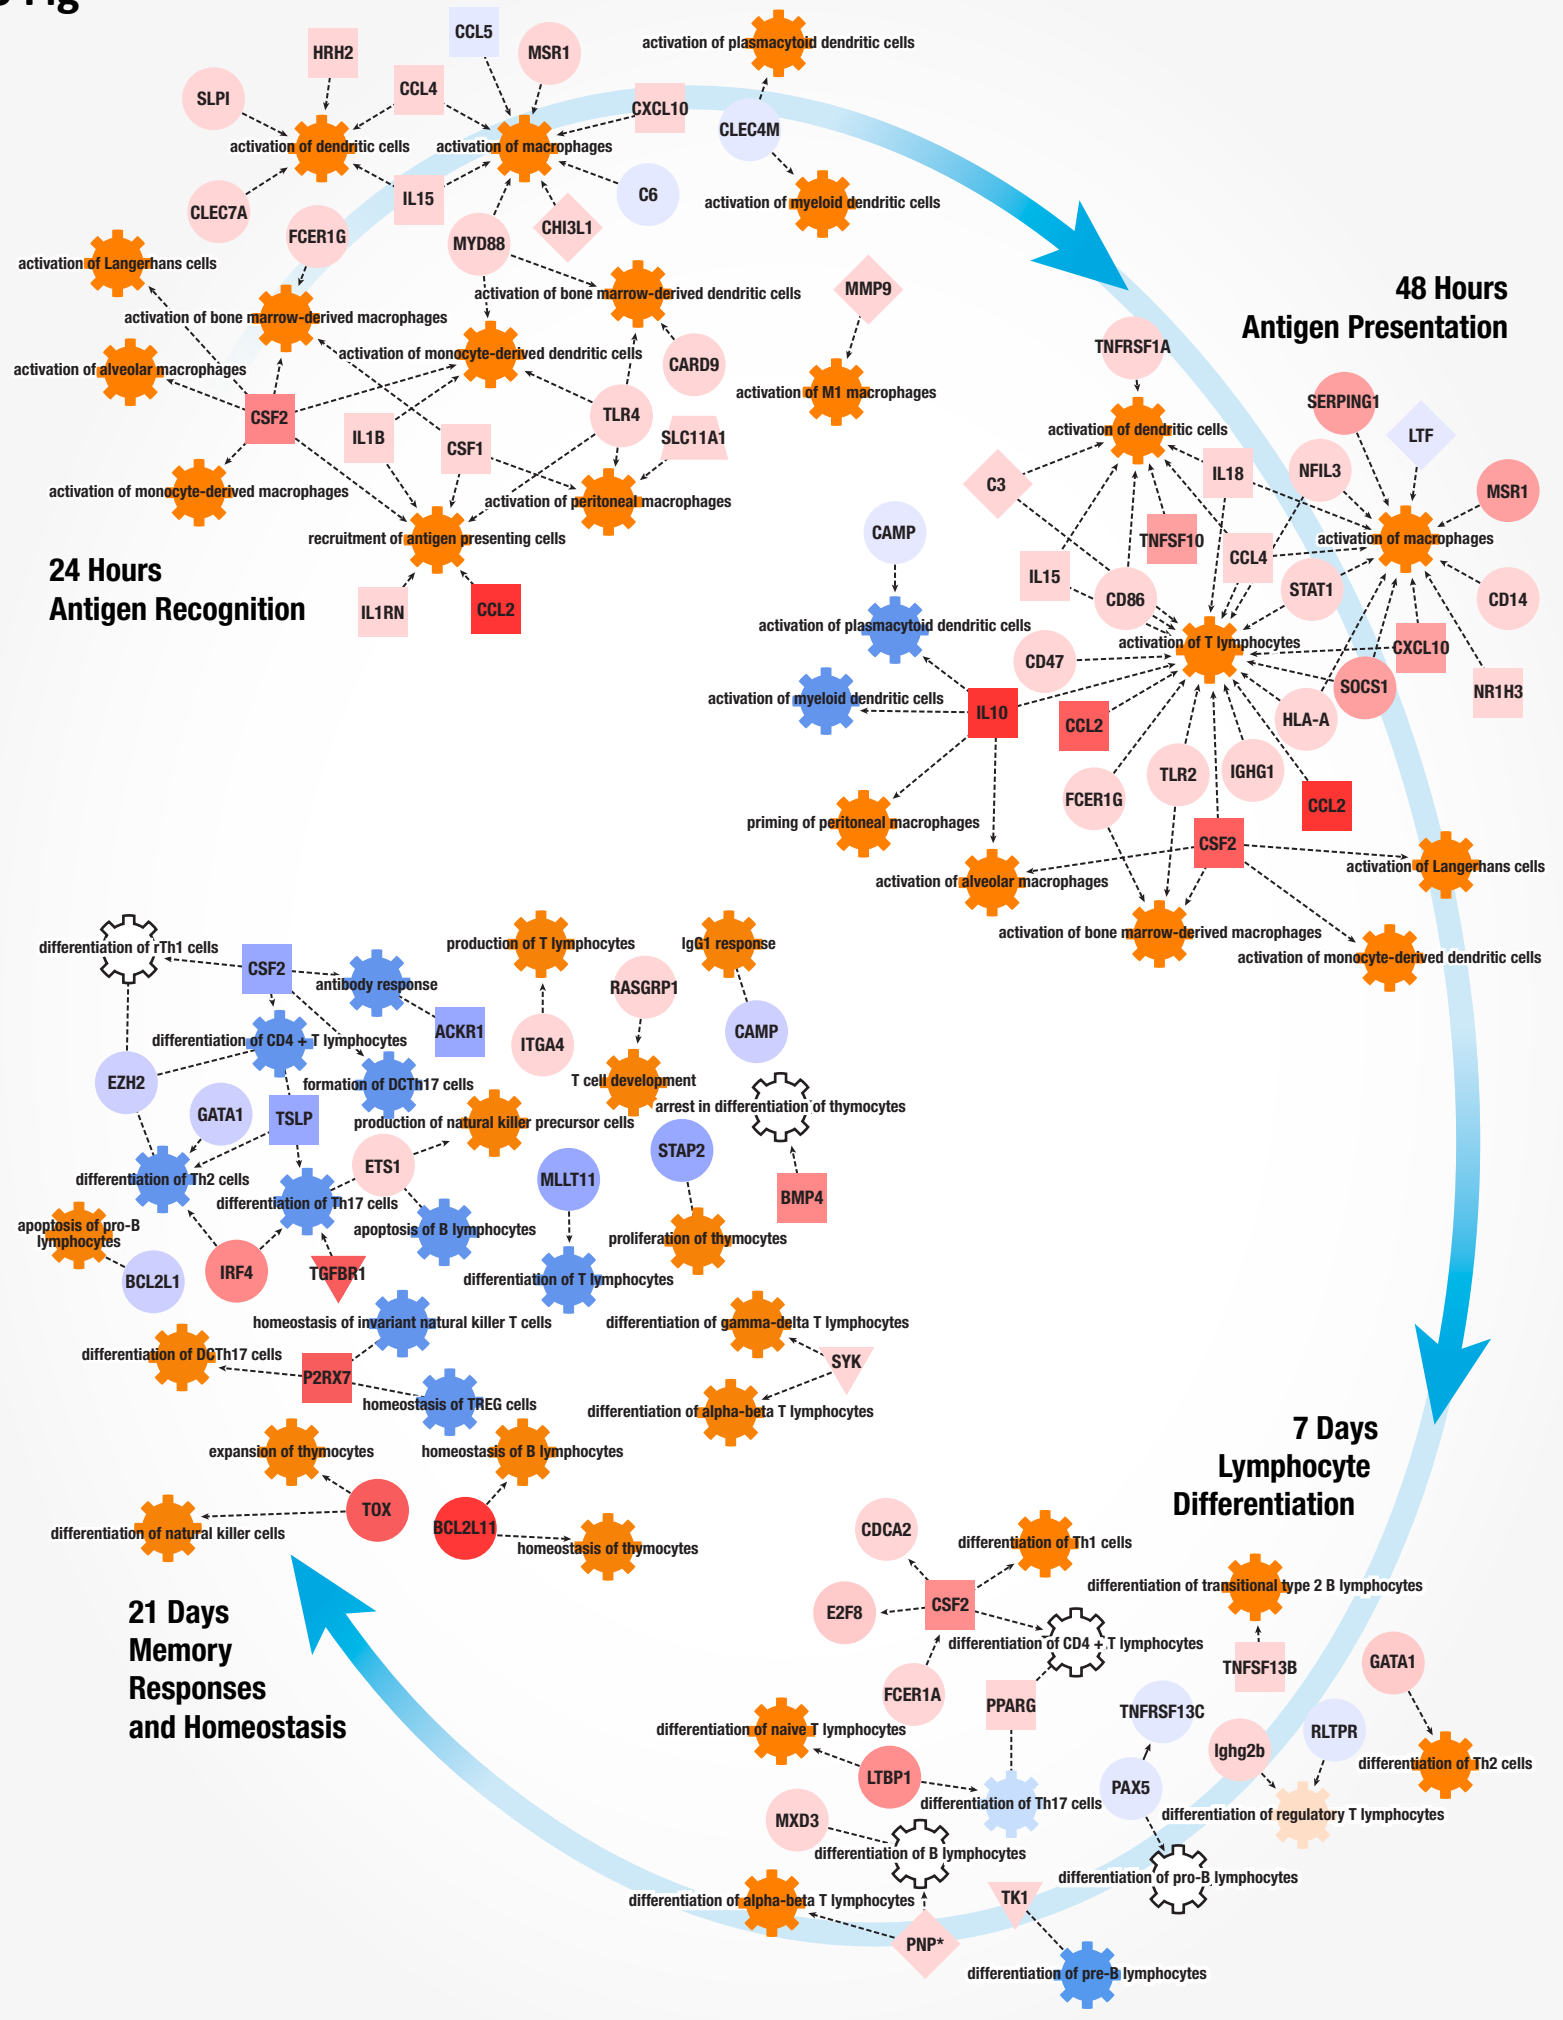

Supplement: pone.0171677.s012.pdf [file pone.0171677.s012.pdf]
