# Supplementary material for: Sm-p80-based schistosomiasis vaccine mediated epistatic interactions identified potential immune signatures for vaccine efficacy in mice and baboons
Source: PubMed Central journal article supplement (PMC5305113; doi:10.1371/journal.pone.0171677), 2017-02-13
Supplement: pone.0171677.s014.pdf [file pone.0171677.s014.pdf]

A

S7 Fig

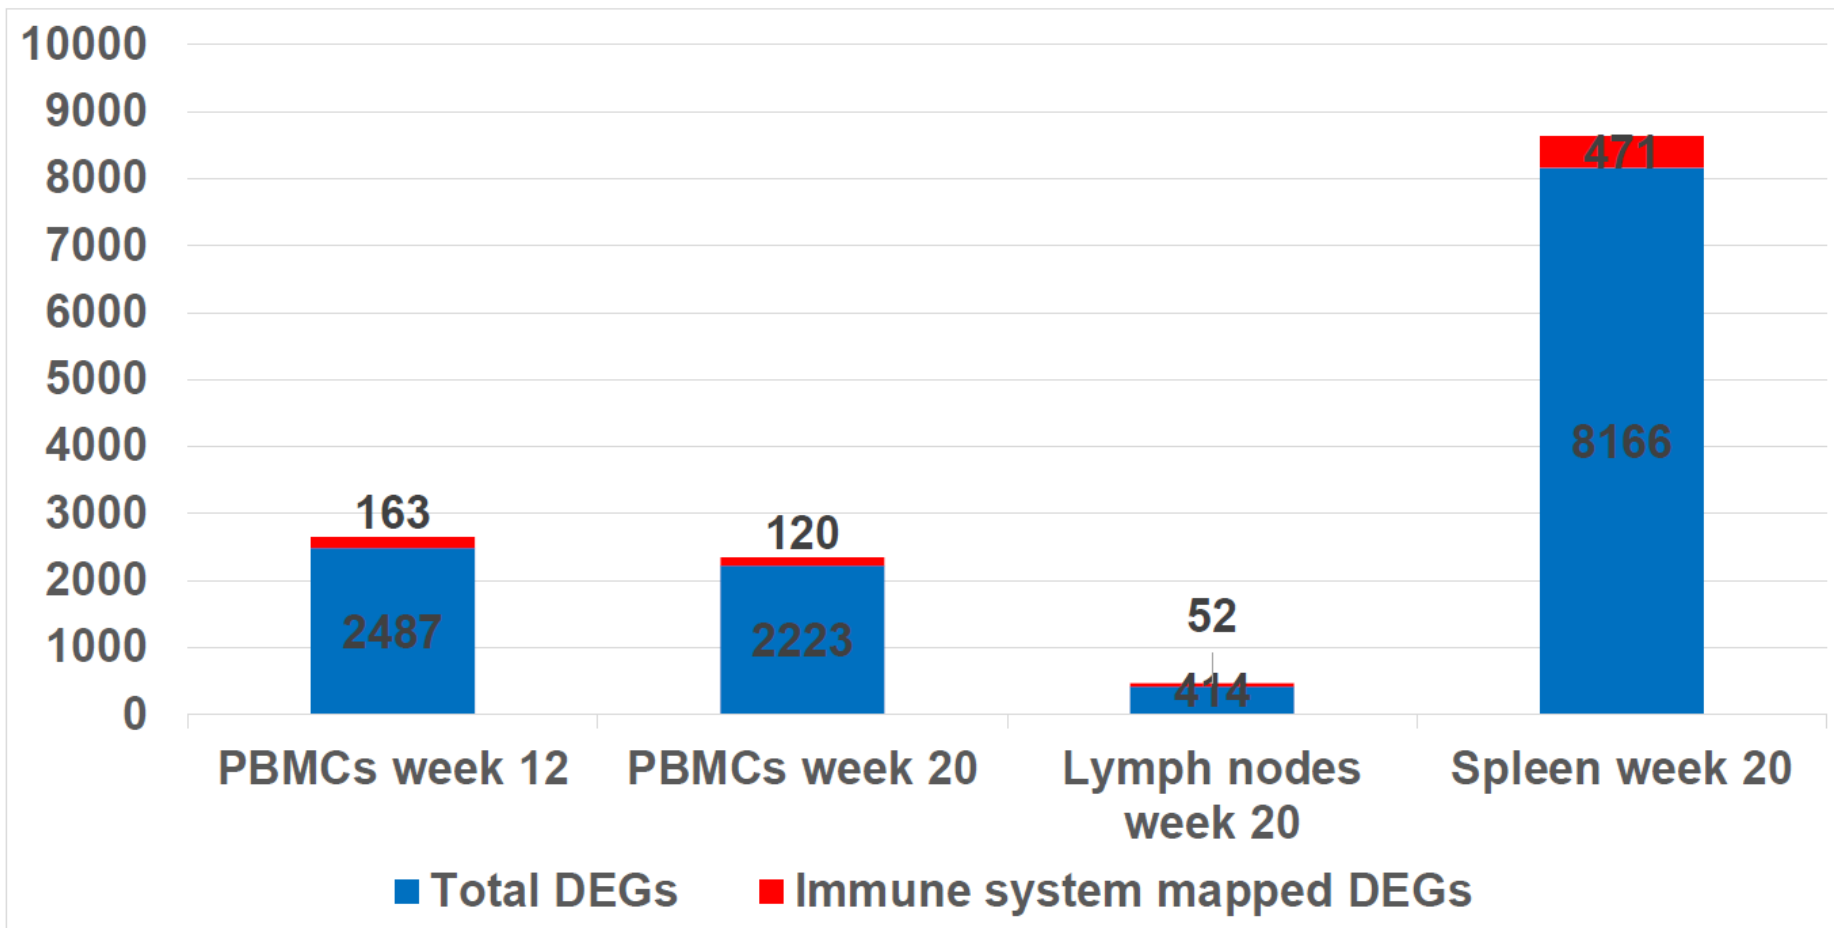

**B**

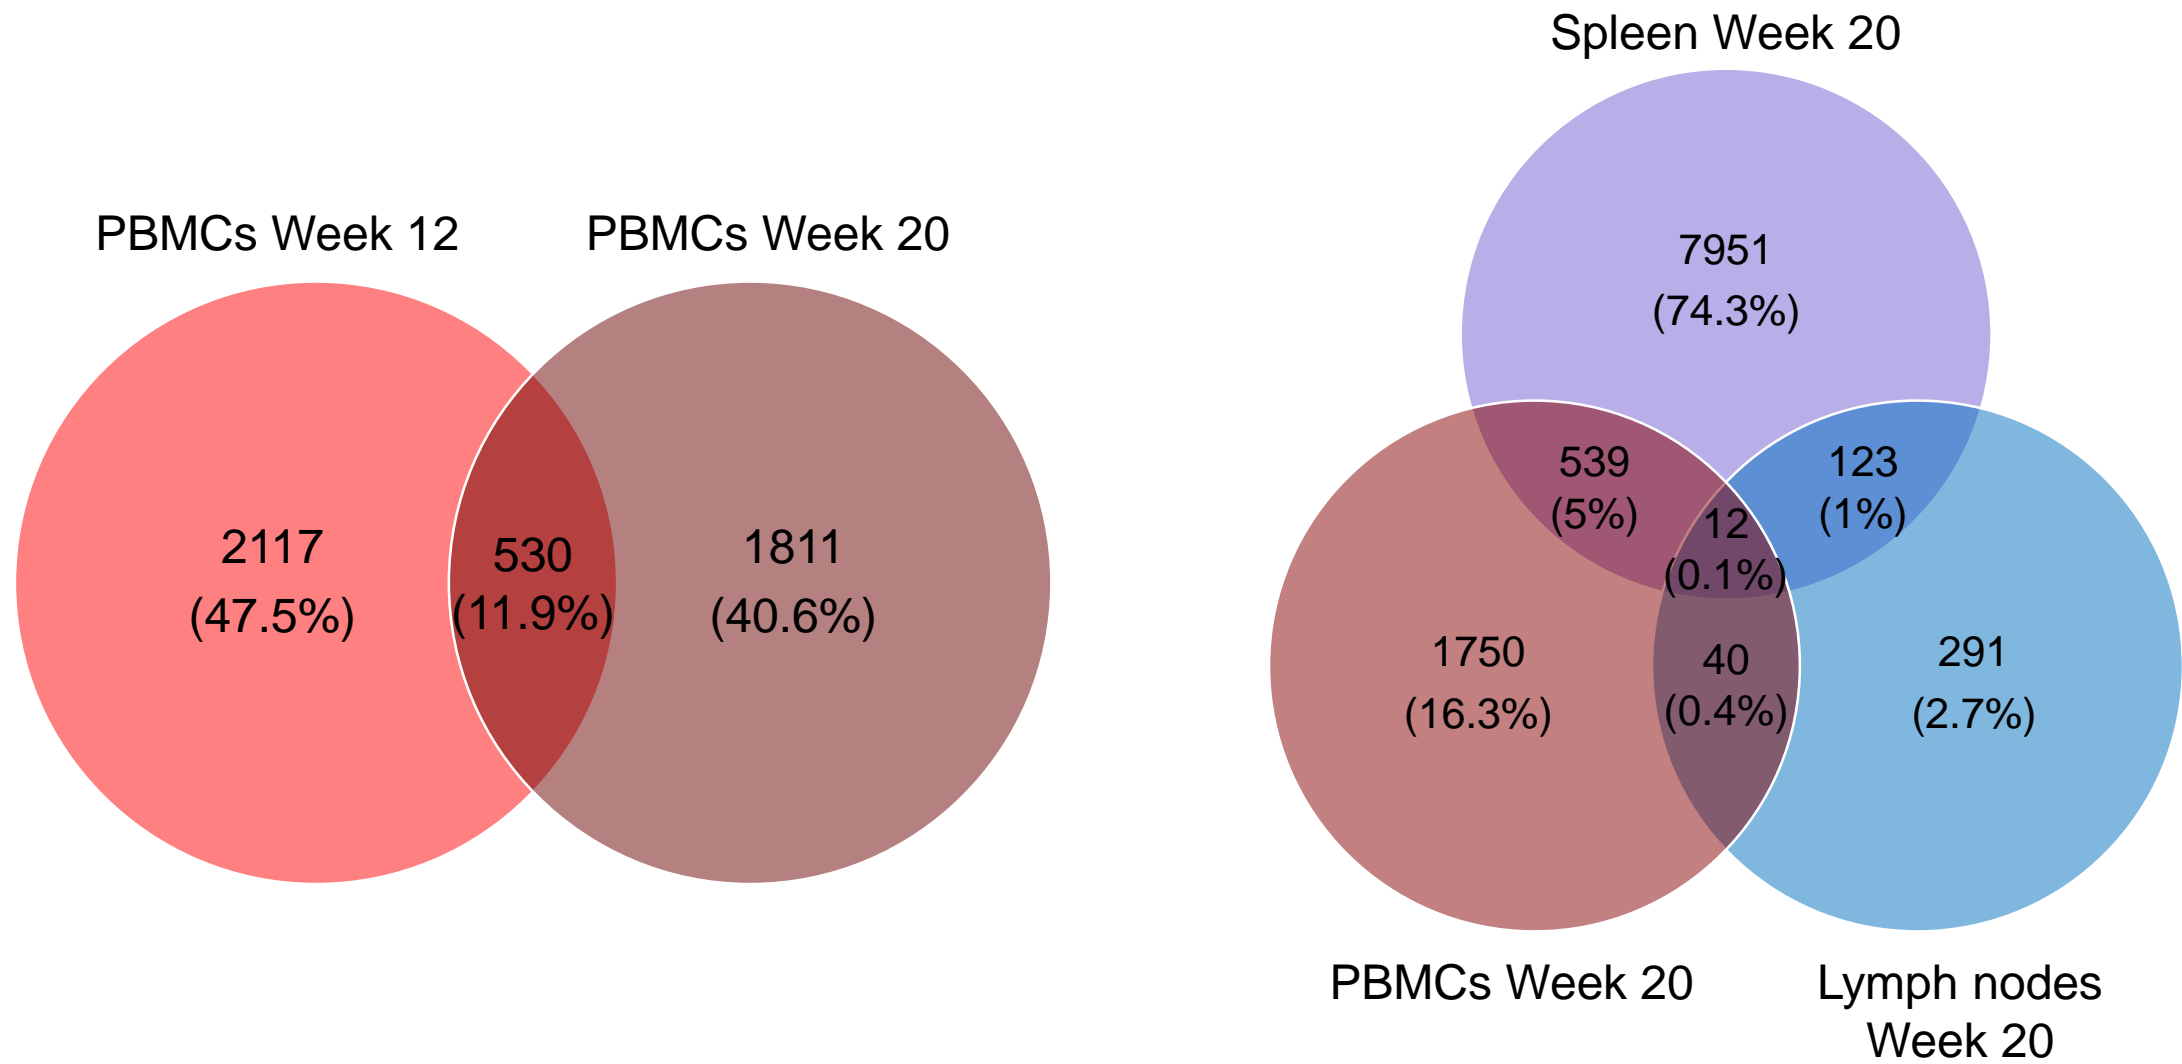

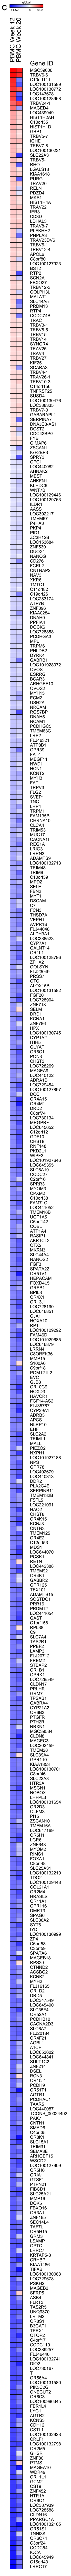

global

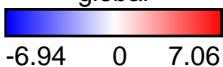

**D**

PBMC Week 20  
Spleen Week 20  
Lymph nodes Week 20

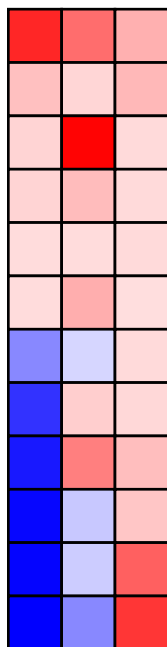

Gene ID

TRBV24-1

LDHAL3

RETN

SELM

SLC39A4

KIF25

TRPV3

S100A16

SOD3

ZNF750

PLEKHA7

C8orf51

**F**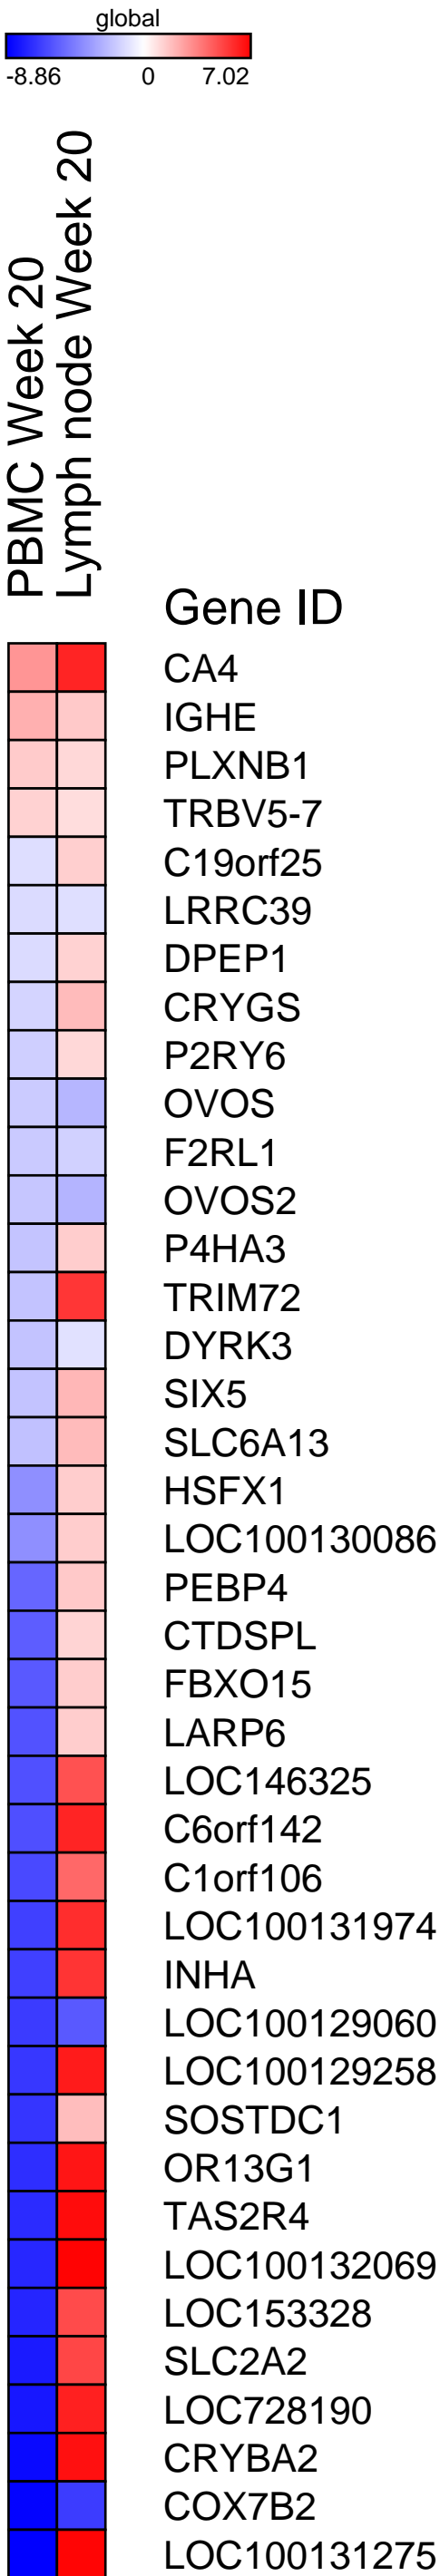



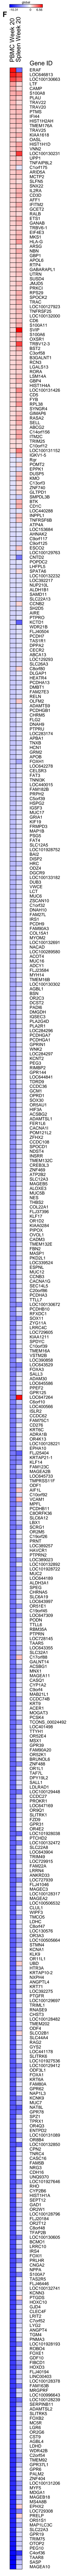

global

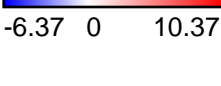

-6.37

0

10.37

**G**

Spleen Week 20

Lymph nodes Week 20

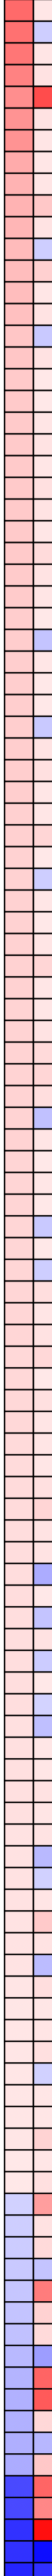**Gene ID**

RPL41  
 IGKV1D-17  
 CCL21  
 RPRML  
 ALG13  
 LOC440733  
 SYCE1L  
 LOC100128952  
 CRIP2  
 LOC729789  
 C1orf86  
 COPZ2  
 FABP4  
 C12orf43  
 CD69  
 PTPRCAP  
 VPS28  
 VAMP5  
 TMEM66  
 IGHV4-28  
 LOC389541  
 TIMM13  
 BCL7C  
 LYL1  
 CYBA  
 IGHV1-24  
 IGLV1-40  
 IGHG4  
 C21orf33  
 LGALS1  
 DRAP1  
 C9orf16  
 NFKBIZ  
 C19orf60  
 CD81  
 TMEM160  
 GPR183  
 C3orf54  
 NUDT1  
 MRPL41  
 DUSP23  
 SCARNA17  
 DERL3  
 CD83  
 IGLV2-11  
 FKBP2  
 GNG11  
 IGLV9-49  
 FAM128B  
 IGKV3D-11  
 VPREB3  
 IGLV4-69  
 KCNE4  
 IGLV2-18  
 TAGAP  
 IGLV5-45  
 CAPN12  
 CCDC28B  
 APOC1  
 CRTAM  
 IGLV3-27  
 SPRY2  
 CFD  
 IGLV3-19  
 C1orf78  
 HES4  
 ATHL1  
 IGFBP6  
 CD300C  
 AP2S1  
 DDEFL1  
 HEXIM2  
 IL17F  
 SAC3D1  
 ZNF688  
 EAF1  
 BOLA1  
 DNAJA1  
 LMAN1L  
 RNF139  
 VMO1  
 TOPORS  
 ADFP  
 FABP5  
 FABP5L7  
 EGFL7  
 ECHDC2  
 TRBV10-1  
 KIR2DL3  
 MAP3K8  
 MMP9  
 PGAM2  
 LOC100129907  
 PTP4A1  
 CEMP1  
 C16orf86  
 FFAR1  
 TFPT  
 CKAP2  
 LOC344332  
 LAG3  
 SCARNA2  
 LOC100129841  
 MPND  
 CYP26B1  
 DIO3OS  
 TNFRSF8  
 RNF207  
 PTPN5  
 PRSS21  
 UMODL1  
 LOC100132791  
 TMEM90A  
 LOC390594  
 CCDC116  
 LOC100129318  
 DMKN  
 OR6T1  
 VGF  
 ZNF807  
 DIRAS3  
 PPP1R14C  
 FLJ41766
