# Supplementary material for: Sm-p80-based schistosomiasis vaccine mediated epistatic interactions identified potential immune signatures for vaccine efficacy in mice and baboons
Source: PubMed Central journal article supplement (PMC5305113; doi:10.1371/journal.pone.0171677), 2017-02-13
Supplement: pone.0171677.s016.pdf [file pone.0171677.s016.pdf]

S1 Table

| Number | Canonica pathway                                             | S. mansoni control challenge | VR1020-Sm-p80 | pcDNA3-Sm-p80 + rSm-p80 + ODN | rSm-p80 + alum | rSm-p80 + GLA | rSm-p80 + ODN |
|--------|--------------------------------------------------------------|------------------------------|---------------|-------------------------------|----------------|---------------|---------------|
| 1      | 14-3-3-mediated Signaling                                    | X                            | X             | X                             |                |               | X             |
| 2      | 3-phosphoinositide Biosynthesis                              | X                            |               |                               |                |               | X             |
| 3      | 3-phosphoinositide Degradation                               | X                            |               |                               |                |               | X             |
| 4      | 4-1BB Signaling in T Lymphocytes                             | X                            | X             |                               |                |               |               |
| 5      | 4-aminobutyrate Degradation I                                |                              |               |                               |                | X             |               |
| 6      | Actin Cytoskeleton Signaling                                 |                              | X             | X                             |                |               | X             |
| 7      | Actin Nucleation by ARP-WASP Complex                         | X                            | X             |                               |                |               | X             |
| 8      | Activation of IRF by Cytosolic Pattern Recognition Receptors | X                            | X             |                               |                |               | X             |
| 9      | Acute Myeloid Leukemia Signaling                             | X                            | X             |                               |                |               | X             |
| 10     | Acute Phase Response Signaling                               | X                            |               |                               |                |               |               |
| 11     | Acyl Carrier Protein Metabolism                              |                              |               |                               | X              |               |               |
| 12     | Adipogenesis pathway                                         |                              |               |                               |                |               | X             |
| 13     | Agrin Interactions at Neuromuscular Junction                 |                              | X             |                               |                |               | X             |
| 14     | Aldosterone Signaling in Epithelial Cells                    | X                            |               |                               |                |               | X             |
| 15     | Allograft Rejection Signaling                                |                              | X             |                               |                |               |               |
| 16     | Altered T Cell and B Cell Signaling in Rheumatoid Arthritis  | X                            | X             |                               |                |               |               |
| 17     | AMPK Signaling                                               | X                            |               | X                             |                |               | X             |
| 18     | Amyloid Processing                                           |                              | X             |                               |                |               |               |
| 19     | Amyotrophic Lateral Sclerosis Signaling                      |                              |               | X                             |                |               | X             |
| 20     | Androgen Signaling                                           | X                            | X             |                               |                |               | X             |
| 21     | Angiotensin Signaling                                        | X                            |               |                               |                |               | X             |
| 22     | Antigen Presentation Pathway                                 | X                            | X             |                               |                |               | X             |
| 23     | Antioxidant Action of Vitamin C                              | X                            |               |                               |                |               |               |
| 24     | Antiproliferative Role of Somatostatin Receptor 2            |                              |               |                               |                |               | X             |
| 25     | Antiproliferative Role of TOB in T Cell Signaling            | X                            |               |                               |                |               |               |
| 26     | Apoptosis Signaling                                          | X                            | X             |                               |                |               | X             |
| 27     | April Mediated Signaling                                     | X                            |               |                               |                |               | X             |
| 28     | Arginine Degradation VI (Arginase 2 Pathway)                 | X                            |               |                               |                |               |               |
| 29     | Arsenate Detoxification I (Glutaredoxin)                     |                              | X             |                               |                |               |               |
| 30     | Aryl Hydrocarbon Receptor Signaling                          | X                            | X             |                               |                |               |               |
| 31     | Assembly of RNA Polymerase I Complex                         | X                            |               |                               |                |               | X             |
| 32     | Assembly of RNA Polymerase II Complex                        | X                            | X             |                               |                |               |               |
| 33     | Assembly of RNA Polymerase III Complex                       | X                            |               | X                             |                |               | X             |
| 34     | ATM Signaling                                                | X                            |               |                               |                |               |               |
| 35     | Autoimmune Thyroid Disease Signaling                         | X                            | X             |                               |                |               |               |
| 36     | autophagy                                                    |                              | X             |                               |                |               | X             |
| 37     | Axonal Guidance Signaling                                    |                              | X             | X                             |                |               | X             |
| 38     | B Cell Activating Factor Signaling                           | X                            |               |                               |                |               |               |
| 39     | B Cell Development                                           | X                            | X             |                               |                |               |               |
| 40     | B Cell Receptor Signaling                                    | X                            | X             | X                             |                |               | X             |
| 41     | Basal Cell Carcinoma Signaling                               |                              |               | X                             |                |               |               |
| 42     | Biotin-carboxyl Carrier Protein Assembly                     |                              |               | X                             |                |               |               |
| 43     | Bladder Cancer Signaling                                     |                              | X             |                               |                |               |               |
| 44     | BMP signaling pathway                                        |                              | X             |                               |                |               |               |
| 45     | Breast Cancer Regulation by Stathmin1                        | X                            | X             |                               |                |               | X             |
| 46     | Calcium Signaling                                            |                              |               | X                             |                | X             | X             |
| 47     | Calcium-induced T Lymphocyte Apoptosis                       | X                            | X             |                               |                |               |               |
| 48     | cAMP-mediated signaling                                      | X                            |               | X                             | X              |               | X             |
| 49     | Cardiac Hypertrophy Signaling                                | X                            | X             |                               |                |               | X             |
| 50     | Cardiac $\beta$ -adrenergic Signaling                        |                              | X             |                               |                |               | X             |
| 51     | Caveolar-mediated Endocytosis Signaling                      | X                            | X             | X                             |                |               | X             |
| 52     | CCR3 Signaling in Eosinophils                                | X                            | X             |                               |                |               | X             |
| 53     | CCR5 Signaling in Macrophages                                |                              | X             |                               |                |               |               |
| 54     | CD27 Signaling in Lymphocytes                                | X                            |               |                               |                |               | X             |
| 55     | CD28 Signaling in T Helper Cells                             | X                            | X             |                               |                |               | X             |
| 56     | CD40 Signaling                                               | X                            | X             |                               |                |               | X             |
| 57     | Cdc42 Signaling                                              | X                            | X             |                               |                |               | X             |
| 58     | CDK5 Signaling                                               | X                            | X             |                               |                |               | X             |
| 59     | CDP-diacylglycerol Biosynthesis I                            |                              | X             |                               |                |               |               |
| 60     | Cell Cycle Control of Chromosomal Replication                | X                            | X             |                               |                |               |               |
| 61     | Cell Cycle Regulation by BTG Family Proteins                 | X                            |               |                               |                |               |               |
| 62     | Cell Cycle: G1/S Checkpoint Regulation                       | X                            | X             |                               |                |               | X             |
| 63     | Cell Cycle: G1/S Checkpoint Regulation                       | X                            |               |                               |                |               | X             |
| 64     | Ceramide Signaling                                           | X                            | X             |                               |                |               |               |
| 65     | Chemokine Signaling                                          | X                            | X             |                               |                |               | X             |
| 66     | Cholecystokinin/Gastrin-mediated Signaling                   | X                            | X             |                               |                |               | X             |
| 67     | Cholesterol Biosynthesis I                                   | X                            |               |                               |                |               |               |
| 68     | Cholesterol Biosynthesis II (via 24,25-dihydrolanosterol)    | X                            |               |                               |                |               |               |
| 69     | Cholesterol Biosynthesis III (via Desmosterol)               | X                            |               |                               |                |               |               |
| 70     | Chronic Myeloid Leukemia Signaling                           | X                            | X             |                               |                |               | X             |
| 71     | Circadian Rhythm Signaling                                   |                              |               |                               |                |               | X             |
| 72     | Clathrin-mediated Endocytosis Signaling                      |                              |               |                               |                |               | X             |
| 73     | CNTF Signaling                                               | X                            | X             |                               |                |               | X             |
| 74     | Coagulation System                                           |                              |               | X                             |                |               |               |
| 75     | Coenzyme A Biosynthesis                                      |                              | X             |                               |                |               |               |
| 76     | Colorectal Cancer Metastasis Signaling                       | X                            | X             |                               |                |               | X             |
| 77     | Communication between Innate and Adaptive Immune Cells       |                              | X             |                               |                |               |               |
| 78     | Corticotropin Releasing Hormone Signaling                    | X                            |               | X                             |                |               | X             |
| 79     | CREB Signaling in Neurons                                    | X                            | X             | X                             |                |               | X             |
| 80     | Crosstalk between Dendritic Cells and Natural Killer Cells   | X                            | X             |                               |                |               | X             |
| 81     | CTLA4 Signaling in Cytotoxic T Lymphocytes                   | X                            | X             |                               |                |               | X             |
| 82     | CXCR4 Signaling                                              | X                            | X             |                               |                |               | X             |
| 83     | Cyclins and Cell Cycle Regulation                            | X                            | X             |                               |                |               |               |
| 84     | Cysteine Biosynthesis III (mammalia)                         | X                            |               |                               |                |               |               |
| 85     | Cytotoxic T Lymphocyte-mediated Apoptosis of Target Cells    | X                            | X             |                               |                | X             |               |
| 86     | Death Receptor Signaling                                     | X                            | X             |                               |                |               | X             |
| 87     | Dendritic Cell Maturation                                    | X                            | X             |                               |                |               | X             |
| 88     | Diphthamide Biosynthesis                                     |                              | X             |                               |                |               |               |
| 89     | D-myo-inositol (1,3,4)-trisphosphate Biosynthesis            |                              |               | X                             |                |               | X             |
| 90     | D-myo-inositol (1,4,5)-trisphosphate Degradation             | X                            |               | X                             |                |               | X             |
| 91     | D-myo-inositol (3,4,5,6)-tetrakisphosphate Biosynthesis      | X                            |               |                               |                |               | X             |
| 92     | D-myo-inositol-5-phosphate Metabolism                        | X                            |               |                               |                |               | X             |
| 93     | DNA damage-induced 14-3-3 $\sigma$ Signaling                 | X                            |               |                               |                |               |               |

|     |                                                                                 |   |   |   |   |  |   |   |
|-----|---------------------------------------------------------------------------------|---|---|---|---|--|---|---|
| 94  | DNA Double-Strand Break Repair by Homologous Recombination                      | X |   |   |   |  |   |   |
| 95  | DNA Double-Strand Break Repair by Non-Homologous End Joining                    | X |   |   |   |  |   | X |
| 96  | DNA Methylation and Transcriptional Repression Signaling                        | X |   |   |   |  |   | X |
| 97  | Docosahexaenoic Acid (DHA) Signaling                                            |   |   |   |   |  |   | X |
| 98  | Dopamine Receptor Signaling                                                     |   | X |   |   |  |   |   |
| 99  | Dopamine-DARPP32 Feedback in cAMP Signaling                                     | X | X | X |   |  |   | X |
| 100 | EGF Signaling                                                                   | X |   | X |   |  |   | X |
| 101 | EIF2 Signaling                                                                  |   |   |   | X |  | X | X |
| 102 | Endometrial Cancer Signaling                                                    | X | X | X |   |  |   | X |
| 103 | Endoplasmic Reticulum Stress Pathway                                            | X |   |   |   |  |   | X |
| 104 | Endothelin-1 Signaling                                                          | X | X | X |   |  |   | X |
| 105 | eNOS Signaling                                                                  |   |   | X |   |  |   |   |
| 106 | Ephrin A Signaling                                                              |   |   | X |   |  |   | X |
| 107 | Ephrin B Signaling                                                              | X | X |   |   |  |   | X |
| 108 | Ephrin Receptor Signaling                                                       | X | X |   |   |  |   | X |
| 109 | Epithelial Adherens Junction Signaling                                          |   |   | X |   |  |   | X |
| 110 | ErbB Signaling                                                                  | X | X |   |   |  |   | X |
| 111 | ErbB2-ErbB3 Signaling                                                           | X | X |   |   |  |   |   |
| 112 | ErbB4 Signaling                                                                 | X | X | X |   |  |   | X |
| 113 | ERK/MAPK Signaling                                                              | X | X |   |   |  |   | X |
| 114 | ERK5 Signaling                                                                  | X |   |   |   |  |   | X |
| 115 | Erythropoietin Signaling                                                        | X | X | X |   |  |   | X |
| 116 | Estrogen Receptor Signaling                                                     | X | X | X |   |  |   | X |
| 117 | Estrogen-Dependent Breast Cancer Signaling                                      | X |   |   |   |  |   | X |
| 118 | Estrogen-mediated S-phase Entry                                                 | X |   |   |   |  |   |   |
| 119 | Factors Promoting Cardiogenesis in Vertebrates                                  |   |   | X |   |  |   | X |
| 120 | FAK Signaling                                                                   | X | X | X |   |  |   | X |
| 121 | Fatty Acid Activation                                                           |   |   | X |   |  |   |   |
| 122 | Fatty Acid $\beta$ -oxidation I                                                 |   | X |   |   |  |   |   |
| 123 | Fc Epsilon RI Signaling                                                         | X | X |   |   |  |   |   |
| 124 | Fcy Receptor-mediated Phagocytosis in Macrophages and Monocytes                 | X | X |   |   |  |   | X |
| 125 | FcyRIIB Signaling in B Lymphocytes                                              | X | X |   |   |  |   |   |
| 126 | FGF Signaling                                                                   |   |   | X |   |  |   |   |
| 127 | FLT3 Signaling in Hematopoietic Progenitor Cells                                | X | X | X |   |  |   | X |
| 128 | fMLP Signaling in Neutrophils                                                   | X | X |   |   |  |   | X |
| 129 | Folate Polyglutamylation                                                        | X |   |   |   |  |   |   |
| 130 | Folate Transformations I                                                        | X |   |   |   |  |   |   |
| 131 | G Beta Gamma Signaling                                                          | X | X |   |   |  |   | X |
| 132 | G Protein Signaling Mediated by Tubby                                           |   | X |   |   |  |   | X |
| 133 | GABA Receptor Signaling                                                         |   |   |   |   |  |   | X |
| 134 | GADD45 Signaling                                                                | X | X |   |   |  |   |   |
| 135 | Gap Junction Signaling                                                          | X | X | X |   |  |   | X |
| 136 | GDNF Family Ligand-Receptor Interactions                                        | X | X |   |   |  |   | X |
| 137 | Geranylgeranyldiphosphate Biosynthesis                                          |   |   | X |   |  |   |   |
| 138 | Germ Cell-Sertoli Cell Junction Signaling                                       | X | X | X |   |  |   | X |
| 139 | Glioblastoma Multiforme Signaling                                               | X | X | X |   |  |   | X |
| 140 | Glioma Invasiveness Signaling                                                   | X | X | X |   |  |   | X |
| 141 | Glioma Signaling                                                                | X | X | X |   |  |   | X |
| 142 | Glucocorticoid Receptor Signaling                                               | X | X |   |   |  |   | X |
| 143 | Gluconeogenesis I                                                               |   | X |   |   |  | X |   |
| 144 | Glutamate Degradation III (via 4-aminobutyrate)                                 |   |   |   |   |  | X |   |
| 145 | Glutamate Receptor Signaling                                                    |   |   | X |   |  |   | X |
| 146 | Glutaryl-CoA Degradation                                                        | X | X |   |   |  |   |   |
| 147 | Glycogen Degradation III                                                        |   | X |   |   |  |   |   |
| 148 | Glycolysis I                                                                    |   | X |   |   |  |   |   |
| 149 | GM-CSF Signaling                                                                | X | X |   |   |  |   | X |
| 150 | GNRH Signaling                                                                  | X | X | X |   |  |   | X |
| 151 | GPCR-Mediated Integration of Enteroendocrine Signaling Exemplified by an L Cell |   |   |   |   |  |   | X |
| 152 | GPCR-Mediated Nutrient Sensing in Enteroendocrine Cells                         |   |   | X |   |  |   | X |
| 153 | G-Protein Coupled Receptor Signaling                                            | X |   | X |   |  |   | X |
| 154 | Graft-versus-Host Disease Signaling                                             | X | X |   |   |  |   |   |
| 155 | Granzyme B Signaling                                                            | X |   |   |   |  |   | X |
| 156 | Growth Hormone Signaling                                                        | X |   | X |   |  |   |   |
| 157 | G $\alpha$ 12/13 Signaling                                                      | X | X | X |   |  |   | X |
| 158 | G $\alpha$ i Signaling                                                          |   |   |   |   |  |   |   |
| 159 | G $\alpha$ q Signaling                                                          | X | X |   |   |  |   | X |
| 160 | G $\alpha$ s Signaling                                                          |   |   | X |   |  |   | X |
| 161 | Heme Degradation                                                                |   | X |   |   |  |   |   |
| 162 | Hepatic Fibrosis / Hepatic Stellate Cell Activation                             |   |   | X |   |  |   | X |
| 163 | HER-2 Signaling in Breast Cancer                                                | X |   |   |   |  |   | X |
| 164 | Hereditary Breast Cancer Signaling                                              | X | X |   |   |  |   |   |
| 165 | HGF Signaling                                                                   | X |   | X |   |  |   | X |
| 166 | HIF1 $\alpha$ Signaling                                                         |   | X |   |   |  |   |   |
| 167 | HIPPO signaling                                                                 | X |   |   |   |  |   | X |
| 168 | HMGB1 Signaling                                                                 | X | X |   |   |  |   |   |
| 169 | Human Embryonic Stem Cell Pluripotency                                          |   |   | X |   |  |   |   |
| 170 | Huntington's Disease Signaling                                                  | X |   |   |   |  |   | X |
| 171 | Hypoxia Signaling in the Cardiovascular System                                  | X |   |   |   |  |   | X |
| 172 | iCOS-iCOSL Signaling in T Helper Cells                                          | X | X |   |   |  |   | X |
| 173 | IGF-1 Signaling                                                                 | X |   | X |   |  |   | X |
| 174 | IL-1 Signaling                                                                  | X |   |   |   |  |   | X |
| 175 | IL-10 Signaling                                                                 | X |   |   |   |  |   |   |
| 176 | IL-12 Signaling and Production in Macrophages                                   | X |   |   |   |  |   |   |
| 177 | IL-15 Production                                                                | X |   |   |   |  |   |   |
| 178 | IL-15 Signaling                                                                 | X | X |   |   |  |   | X |
| 179 | IL-17 Signaling                                                                 | X |   |   |   |  |   |   |
| 180 | IL-17A Signaling in Airway Cells                                                | X |   |   |   |  |   | X |
| 181 | IL-17A Signaling in Fibroblasts                                                 |   | X |   |   |  |   | X |
| 182 | IL-17A Signaling in Gastric Cells                                               |   | X |   |   |  |   |   |
| 183 | IL-2 Signaling                                                                  | X | X |   |   |  |   | X |
| 184 | IL-22 Signaling                                                                 | X |   |   |   |  |   |   |
| 185 | IL-3 Signaling                                                                  | X | X |   |   |  |   | X |
| 186 | IL-4 Signaling                                                                  | X | X | X |   |  |   | X |
| 187 | IL-6 Signaling                                                                  | X | X |   |   |  |   |   |
| 188 | IL-8 Signaling                                                                  | X | X |   |   |  |   | X |
| 189 | IL-9 Signaling                                                                  | X |   |   |   |  |   |   |
| 190 | ILK Signaling                                                                   | X | X |   |   |  | X | X |
| 191 | Induction of Apoptosis by HIV1                                                  | X | X |   |   |  |   |   |

|     |                                                                       |   |   |   |   |   |  |   |
|-----|-----------------------------------------------------------------------|---|---|---|---|---|--|---|
| 192 | Inhibition of Angiogenesis by TSP1                                    | X | X |   |   |   |  |   |
| 193 | iNOS Signaling                                                        | X |   |   |   |   |  | X |
| 194 | Inosine-5'-phosphate Biosynthesis II                                  | X |   |   |   |   |  |   |
| 195 | Inositol Pyrophosphates Biosynthesis                                  |   |   |   | X |   |  |   |
| 196 | Insulin Receptor Signaling                                            | X | X | X |   |   |  | X |
| 197 | Integrin Signaling                                                    | X | X |   |   |   |  | X |
| 198 | Interferon Signaling                                                  | X | X |   |   |   |  | X |
| 199 | Intrinsic Prothrombin Activation Pathway                              |   |   |   | X |   |  |   |
| 200 | Isoleucine Degradation I                                              |   | X |   |   |   |  |   |
| 201 | JAK/Stat Signaling                                                    | X | X |   |   |   |  | X |
| 202 | Ketogenesis                                                           | X | X |   |   |   |  |   |
| 203 | Ketolysis                                                             | X | X |   |   |   |  |   |
| 204 | L-DOPA Degradation                                                    |   | X |   |   |   |  |   |
| 205 | Leptin Signaling in Obesity                                           | X |   | X |   |   |  | X |
| 206 | Leucine Degradation I                                                 | X | X |   |   |   |  |   |
| 207 | Leukocyte Extravasation Signaling                                     | X |   | X |   |   |  | X |
| 208 | Lipid Antigen Presentation by CD1                                     |   |   |   |   |   |  |   |
| 209 | LPS-stimulated MAPK Signaling                                         | X | X |   |   |   |  | X |
| 210 | Lymphotoxin $\beta$ Receptor Signaling                                | X | X |   |   |   |  | X |
| 211 | Macropinocytosis Signaling                                            | X | X |   |   |   |  |   |
| 212 | Mechanisms of Viral Exit from Host Cells                              | X |   |   |   |   |  |   |
| 213 | Melanocyte Development and Pigmentation Signaling                     | X |   | X |   |   |  | X |
| 214 | Melanoma Signaling                                                    | X | X |   |   |   |  |   |
| 215 | Melanin Degradation III                                               |   |   |   | X |   |  |   |
| 216 | Melanin Signaling                                                     |   |   |   |   |   |  | X |
| 217 | Methionine Degradation I (to Homocysteine)                            | X |   | X |   |   |  |   |
| 218 | Mevlonate Pathway I                                                   | X |   |   |   |   |  |   |
| 219 | MIF Regulation of Innate Immunity                                     | X | X |   |   |   |  |   |
| 220 | MIF-mediated Glucocorticoid Regulation                                | X |   |   |   |   |  |   |
| 221 | Mismatch Repair in Eukaryotes                                         | X |   |   |   |   |  | X |
| 222 | Mitochondrial Dysfunction                                             |   |   |   | X |   |  | X |
| 223 | Mitochondrial L-carnitine Shuttle Pathway                             |   |   | X |   |   |  |   |
| 224 | Mitotic Roles of Polo-Like Kinase                                     | X | X |   |   |   |  |   |
| 225 | Molecular Mechanisms of Cancer                                        | X | X | X |   |   |  | X |
| 226 | Molybdenum Cofactor Biosynthesis                                      | X |   |   |   |   |  |   |
| 227 | Mouse Embryonic Stem Cell Pluripotency                                | X | X | X |   |   |  | X |
| 228 | MSP-RON Signaling Pathway                                             |   |   | X |   |   |  | X |
| 229 | mTOR Signaling                                                        |   |   |   |   |   |  | X |
| 230 | Myc Mediated Apoptosis Signaling                                      | X | X |   |   |   |  | X |
| 231 | NADH Repair                                                           |   | X |   |   |   |  |   |
| 232 | Natural Killer Cell Signaling                                         | X | X |   |   |   |  | X |
| 233 | Netrin Signaling                                                      |   |   |   |   |   |  | X |
| 234 | Neuregulin Signaling                                                  | X |   |   |   |   |  | X |
| 235 | Neuropathic Pain Signaling In Dorsal Horn Neurons                     |   |   | X |   |   |  | X |
| 236 | Neuroprotective Role of THOP1 in Alzheimer's Disease                  |   | X |   |   |   |  |   |
| 237 | Neurotrophin/TRK Signaling                                            | X |   | X |   |   |  | X |
| 238 | NF- $\kappa$ B Activation by Viruses                                  | X | X | X |   |   |  | X |
| 239 | NF- $\kappa$ B Signaling                                              | X |   | X |   |   |  | X |
| 240 | NGF Signaling                                                         | X | X | X |   |   |  | X |
| 241 | Nitric Oxide Signaling in the Cardiovascular System                   |   |   | X |   |   |  |   |
| 242 | nNOS Signaling in Skeletal Muscle Cells                               |   |   | X |   |   |  |   |
| 243 | Non-Small Cell Lung Cancer Signaling                                  | X | X |   |   |   |  | X |
| 244 | Notch Signaling                                                       | X |   | X |   |   |  | X |
| 245 | NRF2-mediated Oxidative Stress Response                               | X | X |   |   |   |  | X |
| 246 | Nucleotide Excision Repair Pathway                                    | X |   |   |   |   |  |   |
| 247 | Nur77 Signaling in T Lymphocytes                                      | X | X |   |   |   |  |   |
| 248 | Oncostatin M Signaling                                                | X | X |   |   |   |  |   |
| 249 | Ovarian Cancer Signaling                                              | X |   | X |   |   |  |   |
| 250 | OX40 Signaling Pathway                                                |   | X |   |   |   |  |   |
| 251 | Oxidative Phosphorylation                                             |   |   |   | X |   |  | X |
| 252 | P2Y Purigenic Receptor Signaling Pathway                              | X | X |   |   |   |  | X |
| 253 | p38 MAPK Signaling                                                    | X | X |   |   |   |  |   |
| 254 | p53 Signaling                                                         | X |   |   |   |   |  | X |
| 255 | p70S6K Signaling                                                      | X | X | X |   |   |  | X |
| 256 | PAK Signaling                                                         | X | X |   |   |   |  | X |
| 257 | Pancreatic Adenocarcinoma Signaling                                   | X | X |   |   |   |  | X |
| 258 | Paxillin Signaling                                                    | X | X | X |   |   |  | X |
| 259 | PDGF Signaling                                                        | X | X | X |   |   |  | X |
| 260 | PDF Signaling                                                         | X | X |   |   |   |  |   |
| 261 | phagosome formation                                                   |   |   | X |   |   |  | X |
| 262 | phagosome maturation                                                  |   | X |   |   |   |  | X |
| 263 | Phosphatidylglycerol Biosynthesis II (Non-plastidic)                  |   | X |   |   |   |  |   |
| 264 | Phospholipase C Signaling                                             | X | X |   |   |   |  | X |
| 265 | PI3K Signaling in B Lymphocytes                                       | X | X | X |   |   |  | X |
| 266 | PI3K/AKT Signaling                                                    | X |   |   |   |   |  | X |
| 267 | PKC $\theta$ Signaling in T Lymphocytes                               | X | X |   |   |   |  | X |
| 268 | PPAR Signaling                                                        |   |   |   |   |   |  | X |
| 269 | PPAR $\alpha$ /RXR $\alpha$ Activation                                | X |   | X |   |   |  | X |
| 270 | Primary Immunodeficiency Signaling                                    | X | X |   |   |   |  |   |
| 271 | Production of Nitric Oxide and Reactive Oxygen Species in Macrophages | X | X |   |   |   |  | X |
| 272 | Prolactin Signaling                                                   | X | X | X |   |   |  | X |
| 273 | Proline Biosynthesis I                                                | X |   |   |   |   |  |   |
| 274 | Proline Biosynthesis II (from Arginine)                               | X |   |   |   |   |  |   |
| 275 | Prostate Cancer Signaling                                             | X |   |   |   | X |  | X |
| 276 | Protein Kinase A Signaling                                            | X | X | X |   |   |  | X |
| 277 | Protein Ubiquitination Pathway                                        | X |   |   | X |   |  | X |
| 278 | PRPP Biosynthesis I                                                   |   |   |   |   |   |  |   |
| 279 | PTEN Signaling                                                        |   |   | X |   |   |  | X |
| 280 | Pyridoxal 5'-phosphate Salvage Pathway                                | X |   |   |   |   |  |   |
| 281 | Pyrimidine Ribonucleotides De Novo Biosynthesis                       |   | X |   |   |   |  |   |
| 282 | Rac Signaling                                                         | X | X |   |   |   |  | X |
| 283 | RAN Signaling                                                         |   |   |   |   |   |  | X |
| 284 | RANK Signaling in Osteoclasts                                         | X |   | X |   |   |  | X |
| 285 | RAR Activation                                                        | X |   | X |   |   |  | X |
| 286 | Reelin Signaling in Neurons                                           | X |   |   |   |   |  | X |
| 287 | Regulation of Actin-based Motility by Rho                             |   | X |   |   |   |  | X |
| 288 | Regulation of Cellular Mechanics by Calpain Protease                  | X | X |   |   |   |  | X |
| 289 | Regulation of eIF4 and p70S6K Signaling                               | X |   |   |   |   |  | X |

|     |                                                                             |   |   |   |   |   |   |
|-----|-----------------------------------------------------------------------------|---|---|---|---|---|---|
| 290 | Regulation of IL-2 Expression in Activated and Anergic T Lymphocytes        | X | X |   |   |   | X |
| 291 | Regulation of the Epithelial-Mesenchymal Transition Pathway                 | X |   | X |   |   | X |
| 292 | Relaxin Signaling                                                           | X |   |   |   |   | X |
| 293 | Remodeling of Epithelial Adherens Junctions                                 | X | X | X | X |   | X |
| 294 | Renal Cell Carcinoma Signaling                                              | X | X |   |   |   | X |
| 295 | Renin-Angiotensin Signaling                                                 | X | X | X |   |   | X |
| 296 | Retinoic acid Mediated Apoptosis Signaling                                  | X |   |   |   |   | X |
| 297 | RhoA Signaling                                                              |   | X |   |   |   | X |
| 298 | RhoGDI Signaling                                                            |   | X |   |   |   | X |
| 299 | Role of BRCA1 in DNA Damage Response                                        | X | X |   |   |   | X |
| 300 | Role of CHK Proteins in Cell Cycle Checkpoint Control                       | X |   |   |   |   | X |
| 301 | Role of IL-17A in Arthritis                                                 | X |   |   |   |   | X |
| 302 | Role of JAK family kinases in IL-6-type Cytokine Signaling                  | X |   |   |   |   | X |
| 303 | Role of JAK1 and JAK3 in yc Cytokine Signaling                              | X | X |   |   |   | X |
| 304 | Role of JAK2 in Hormone-like Cytokine Signaling                             | X |   |   |   |   | X |
| 305 | Role of Macrophages, Fibroblasts and Endothelial Cells in Rheumatoid Arthri | X |   |   |   |   | X |
| 306 | Role of MAPK Signaling in the Pathogenesis of Influenza                     | X | X |   |   |   | X |
| 307 | Role of NANOG in Mammalian Embryonic Stem Cell Pluripotency                 | X |   | X |   |   | X |
| 308 | Role of NFAT in Cardiac Hypertrophy                                         | X | X |   |   |   | X |
| 309 | Role of NFAT in Regulation of the Immune Response                           | X | X |   |   |   | X |
| 310 | Role of Oct4 in Mammalian Embryonic Stem Cell Pluripotency                  | X |   |   |   |   | X |
| 311 | Role of Osteoblasts, Osteoclasts and Chondrocytes in Rheumatoid Arthritis   | X |   | X |   |   | X |
| 312 | Role of p14/p19ARF in Tumor Suppression                                     | X |   |   |   |   | X |
| 313 | Role of PI3K/AKT Signaling in the Pathogenesis of Influenza                 | X |   |   |   |   | X |
| 314 | Role of PKR in Interferon Induction and Antiviral Response                  | X |   |   |   |   | X |
| 315 | Role of RIG1-like Receptors in Antiviral Innate Immunity                    | X |   |   |   |   | X |
| 316 | Role of Tissue Factor in Cancer                                             | X | X |   |   |   | X |
| 317 | Role of Wnt/GSK-3 $\beta$ Signaling in the Pathogenesis of Influenza        | X |   | X |   |   | X |
| 318 | Salvage Pathways of Pyrimidine Ribonucleotides                              | X | X |   |   |   | X |
| 319 | SAPK/JNK Signaling                                                          | X | X |   |   |   | X |
| 320 | Selenocysteine Biosynthesis II (Archaea and Eukaryotes)                     | X | X |   |   |   | X |
| 321 | Semaphorin Signaling in Neurons                                             | X |   |   |   |   | X |
| 322 | Serine Biosynthesis                                                         | X |   |   |   |   | X |
| 323 | Sertoli Cell-Sertoli Cell Junction Signaling                                | X | X | X |   |   | X |
| 324 | Signaling by Rho Family GTPases                                             | X | X |   |   |   | X |
| 325 | Small Cell Lung Cancer Signaling                                            | X |   |   |   |   | X |
| 326 | Sonic Hedgehog Signaling                                                    | X |   |   |   | X | X |
| 327 | Sperm Motility                                                              | X |   | X |   |   | X |
| 328 | Spermidine Biosynthesis I                                                   | X |   |   |   |   | X |
| 329 | Spermine Biosynthesis                                                       | X |   |   |   |   | X |
| 330 | Sphingosine-1-phosphate Signaling                                           | X | X |   |   |   | X |
| 331 | STAT3 Pathway                                                               | X |   | X |   |   | X |
| 332 | Sucrose Degradation V (Mammalian)                                           | X | X |   |   |   | X |
| 333 | Superpathway of Cholesterol Biosynthesis                                    | X |   |   |   |   | X |
| 334 | Superpathway of D-myo-inositol (1,4,5)-trisphosphate Metabolism             | X |   | X |   |   | X |
| 335 | Superpathway of Inositol Phosphate Compounds                                | X |   | X |   |   | X |
| 336 | Superpathway of Methionine Degradation                                      | X |   |   |   |   | X |
| 337 | Superpathway of Serine and Glycine Biosynthesis I                           | X |   |   |   |   | X |
| 338 | Synaptic Long Term Depression                                               | X |   | X |   |   | X |
| 339 | Synaptic Long Term Potentiation                                             | X | X | X |   |   | X |
| 340 | Systemic Lupus Erythematosus Signaling                                      | X | X |   |   |   | X |
| 341 | T Cell Receptor Signaling                                                   | X | X |   |   |   | X |
| 342 | T Helper Cell Differentiation                                               | X | X |   |   |   | X |
| 343 | TCA Cycle II (Eukaryotic)                                                   | X | X |   |   |   | X |
| 344 | Tec Kinase Signaling                                                        | X | X |   |   |   | X |
| 345 | Telomerase Signaling                                                        | X | X |   |   |   | X |
| 346 | Tetrahydrobiopterin Biosynthesis I                                          | X | X |   |   |   | X |
| 347 | Tetrahydrobiopterin Biosynthesis II                                         | X | X |   |   |   | X |
| 348 | TGF- $\beta$ Signaling                                                      | X | X |   |   |   | X |
| 349 | Thio-molybdenum Cofactor Biosynthesis                                       | X |   |   | X |   | X |
| 350 | Thiosulfate Disproportionation III (Rhodanese)                              | X | X |   |   |   | X |
| 351 | Thrombin Signaling                                                          | X | X | X |   |   | X |
| 352 | Thrombopoietin Signaling                                                    | X | X | X |   |   | X |
| 353 | Thymine Degradation                                                         | X |   | X |   |   | X |
| 354 | Thyroid Cancer Signaling                                                    | X |   |   |   |   | X |
| 355 | Tight Junction Signaling                                                    | X |   |   |   |   | X |
| 356 | TNFR1 Signaling                                                             | X |   |   |   |   | X |
| 357 | TNFR2 Signaling                                                             | X |   |   |   |   | X |
| 358 | Toll-like Receptor Signaling                                                | X |   |   |   |   | X |
| 359 | TR/RXR Activation                                                           | X |   | X |   |   | X |
| 360 | TREM1 Signaling                                                             | X |   |   |   |   | X |
| 361 | Triacylglycerol Degradation                                                 | X | X |   |   |   | X |
| 362 | tRNA Charging                                                               | X |   |   |   |   | X |
| 363 | Tryptophan Degradation III (Eukaryotic)                                     | X | X |   |   |   | X |
| 364 | Tumoricidal Function of Hepatic Natural Killer Cells                        | X |   |   |   |   | X |
| 365 | TWEAK Signaling                                                             | X |   |   |   |   | X |
| 366 | Type I Diabetes Mellitus Signaling                                          | X | X |   |   |   | X |
| 367 | Type II Diabetes Mellitus Signaling                                         | X |   | X |   |   | X |
| 368 | UDP-N-acetyl-D-galactosamine Biosynthesis II                                | X | X |   |   |   | X |
| 369 | Unfolded protein response                                                   | X |   |   |   |   | X |
| 370 | Uracil Degradation II (Reductive)                                           | X |   | X |   |   | X |
| 371 | Uridine-5'-phosphate Biosynthesis                                           | X | X |   |   |   | X |
| 372 | UVA-Induced MAPK Signaling                                                  | X | X | X |   |   | X |
| 373 | UVB-Induced MAPK Signaling                                                  | X | X |   |   |   | X |
| 374 | UVG-Induced MAPK Signaling                                                  | X | X |   |   |   | X |
| 375 | Valine Degradation I                                                        | X | X |   |   |   | X |
| 376 | VDR/RXR Activation                                                          | X |   |   |   |   | X |
| 377 | VEGF Family Ligand-Receptor Interactions                                    | X | X | X |   |   | X |
| 378 | VEGF Signaling                                                              | X |   |   |   | X | X |
| 379 | Virus Entry via Endocytic Pathways                                          | X | X |   |   |   | X |
| 380 | Wnt/Ca+ pathway                                                             | X |   | X |   |   | X |
| 381 | Wnt/ $\beta$ -catenin Signaling                                             | X |   |   |   |   | X |
| 382 | Xenobiotic Metabolism Signaling                                             | X |   |   |   |   | X |
| 383 | Zymosterol Biosynthesis                                                     | X |   |   |   |   | X |
| 384 | $\alpha$ -Adrenergic Signaling                                              | X | X |   |   |   | X |
| 385 | $\gamma$ -glutamyl Cycle                                                    | X | X |   |   |   | X |
