# Supplementary material for: Sm-p80-based schistosomiasis vaccine mediated epistatic interactions identified potential immune signatures for vaccine efficacy in mice and baboons
Source: PubMed Central journal article supplement (PMC5305113; doi:10.1371/journal.pone.0171677), 2017-02-13
Supplement: pone.0171677.s017.pdf [file pone.0171677.s017.pdf]

S2 Table

| Number | Canonical pathway                                            | PBMC Week 12 | PBMC Week 20 | Lymph nodes Week 20 | Spleen Week 20 |
|--------|--------------------------------------------------------------|--------------|--------------|---------------------|----------------|
| 1      | 14-3-3-mediated Signaling                                    |              |              |                     | X              |
| 2      | 3-phosphoinositide Biosynthesis                              |              |              |                     | X              |
| 3      | 3-phosphoinositide Degradation                               |              |              | X                   | X              |
| 4      | 4-1BB Signaling in T Lymphocytes                             |              |              |                     | X              |
| 5      | Acetone Degradation I (to Methylglyoxal)                     | X            |              |                     |                |
| 6      | Actin Cytoskeleton Signaling                                 |              |              |                     | X              |
| 7      | Actin Nucleation by ARP-WASP Complex                         |              |              |                     | X              |
| 8      | Activation of IRF by Cytosolic Pattern Recognition Receptors |              |              |                     | X              |
| 9      | Acute Myeloid Leukemia Signaling                             |              |              |                     | X              |
| 10     | Acute Phase Response Signaling                               |              |              |                     | X              |
| 11     | Adipogenesis pathway                                         |              |              |                     | X              |
| 12     | Agranulocyte Adhesion and Diapedesis                         | X            | X            |                     |                |
| 13     | Aldosterone Signaling in Epithelial Cells                    |              |              | X                   | X              |
| 14     | AMPK Signaling                                               |              |              |                     | X              |
| 15     | Amyloid Processing                                           |              |              |                     | X              |
| 16     | Androgen Signaling                                           |              |              |                     | X              |
| 17     | Angiopoietin Signaling                                       |              |              |                     | X              |
| 18     | Antigen Presentation Pathway                                 |              |              |                     | X              |
| 19     | Antiproliferative Role of Somatostatin Receptor 2            |              |              |                     | X              |
| 20     | Antiproliferative Role of TOB in T Cell Signaling            |              |              |                     | X              |
| 21     | Apoptosis Signaling                                          |              |              |                     | X              |
| 22     | April Mediated Signaling                                     |              |              |                     | X              |
| 23     | Aryl Hydrocarbon Receptor Signaling                          |              |              |                     | X              |
| 24     | Assembly of RNA Polymerase II Complex                        |              |              |                     | X              |
| 25     | Assembly of RNA Polymerase III Complex                       |              |              |                     | X              |
| 26     | Atherosclerosis Signaling                                    |              | X            |                     |                |
| 27     | ATM Signaling                                                |              |              |                     | X              |
| 28     | Autoimmune Thyroid Disease Signaling                         |              |              |                     | X              |
| 29     | Autophagy                                                    |              |              |                     | X              |
| 30     | Axonal Guidance Signaling                                    |              |              |                     | X              |
| 31     | B Cell Activating Factor Signaling                           |              |              |                     | X              |
| 32     | B Cell Development                                           |              |              |                     | X              |
| 33     | B Cell Receptor Signaling                                    |              |              |                     | X              |
| 34     | BER pathway                                                  |              |              |                     | X              |
| 35     | BMP signaling pathway                                        |              |              |                     | X              |
| 36     | Breast Cancer Regulation by Stathmin1                        |              |              |                     | X              |
| 37     | Bupropion Degradation                                        | X            |              |                     |                |
| 38     | Calcium Signaling                                            |              |              |                     | X              |
| 39     | Calcium-induced T Lymphocyte Apoptosis                       |              |              |                     | X              |
| 40     | cAMP-mediated signaling                                      | X            | X            |                     |                |
| 41     | Cancer Drug Resistance By Drug Efflux                        |              |              |                     | X              |
| 42     | Cardiac Hypertrophy Signaling                                |              |              |                     | X              |
| 43     | Cardiac $\beta$ -adrenergic Signaling                        |              |              |                     | X              |
| 44     | Cardiomyocyte Differentiation via BMP Receptors              | X            |              |                     |                |
| 45     | Caveolar-mediated Endocytosis Signaling                      |              |              |                     | X              |
| 46     | CCR3 Signaling in Eosinophils                                |              |              |                     | X              |
| 47     | CCR5 Signaling in Macrophages                                |              |              |                     | X              |
| 48     | CD27 Signaling in Lymphocytes                                |              |              |                     | X              |
| 49     | CD28 Signaling in T Helper Cells                             |              |              |                     | X              |
| 50     | CD40 Signaling                                               |              |              |                     | X              |
| 51     | Cdc42 Signaling                                              |              |              |                     | X              |
| 52     | CDK5 Signaling                                               |              |              |                     | X              |
| 53     | Cell Cycle Control of Chromosomal Replication                |              |              |                     | X              |
| 54     | Cell Cycle Regulation by BTG Family Proteins                 |              |              |                     | X              |
| 55     | Cell Cycle: G1/S Checkpoint Regulation                       |              |              |                     | X              |
| 56     | Cell Cycle: G2/M DNA Damage Checkpoint Regulation            |              |              |                     | X              |
| 57     | Ceramide Signaling                                           |              |              |                     | X              |
| 58     | Chemokine Signaling                                          |              |              |                     | X              |
| 59     | Cholecystokinin/Gastrin-mediated Signaling                   |              |              |                     | X              |
| 60     | Chronic Myeloid Leukemia Signaling                           |              |              |                     | X              |
| 61     | Clathrin-mediated Endocytosis Signaling                      |              |              |                     | X              |
| 62     | Cleavage and Polyadenylation of Pre-mRNA                     |              |              |                     | X              |
| 63     | CNTF Signaling                                               |              |              |                     | X              |
| 64     | Coagulation System                                           |              |              | X                   |                |
| 65     | Colorectal Cancer Metastasis Signaling                       |              |              |                     | X              |
| 66     | Communication between Innate and Adaptive Immune Cells       |              |              | X                   |                |
| 67     | Corticotropin Releasing Hormone Signaling                    |              |              |                     | X              |
| 68     | CREB Signaling in Neurons                                    |              |              |                     | X              |
| 69     | Crosstalk between Dendritic Cells and Natural Killer Cells   |              |              | X                   | X              |
| 70     | CTLA4 Signaling in Cytotoxic T Lymphocytes                   |              |              |                     | X              |
| 71     | CXCR4 Signaling                                              |              |              |                     | X              |
| 72     | Cyclins and Cell Cycle Regulation                            |              |              |                     | X              |
| 73     | Cytotoxic T Lymphocyte-mediated Apoptosis of Target Cells    |              |              |                     | X              |
| 74     | Death Receptor Signaling                                     |              |              |                     | X              |
| 75     | Dendritic Cell Maturation                                    |              |              |                     | X              |
| 76     | Dermatan Sulfate Degradation (Metazoa)                       |              |              | X                   |                |

|     |                                                                                                    |   |   |   |   |
|-----|----------------------------------------------------------------------------------------------------|---|---|---|---|
| 77  | Differential Regulation of Cytokine Production in Intestinal Epithelial Cells by IL-17A and IL-17F |   |   | X |   |
| 78  | D-myo-inositol (1,4,5,6)-Tetrakisphosphate Biosynthesis                                            |   |   | X | X |
| 79  | D-myo-inositol (3,4,5,6)-tetrakisphosphate Biosynthesis                                            |   |   | X | X |
| 80  | D-myo-inositol-5-phosphate Metabolism                                                              |   |   | X | X |
| 81  | DNA damage-induced 14-3-3 $\sigma$ Signaling                                                       |   |   |   | X |
| 82  | DNA Double-Strand Break Repair by Homologous Recombination                                         |   |   |   | X |
| 83  | DNA Double-Strand Break Repair by Non-Homologous End Joining                                       |   |   |   | X |
| 84  | DNA Methylation and Transcriptional Repression Signaling                                           |   |   |   | X |
| 85  | Dopamine-DARPP32 Feedback in cAMP Signaling                                                        |   |   |   | X |
| 86  | EGF Signaling                                                                                      |   |   |   | X |
| 87  | EIF2 Signaling                                                                                     | X |   |   | X |
| 88  | Endometrial Cancer Signaling                                                                       |   |   |   | X |
| 89  | Endoplasmic Reticulum Stress Pathway                                                               |   |   |   | X |
| 90  | eNOS Signaling                                                                                     |   |   |   | X |
| 91  | Ephrin A Signaling                                                                                 |   |   |   | X |
| 92  | Ephrin B Signaling                                                                                 |   |   |   | X |
| 93  | Ephrin Receptor Signaling                                                                          |   |   |   | X |
| 94  | Epithelial Adherens Junction Signaling                                                             |   |   |   | X |
| 95  | ErbB Signaling                                                                                     |   |   |   | X |
| 96  | ErbB2-ErbB3 Signaling                                                                              |   |   |   | X |
| 97  | ErbB4 Signaling                                                                                    |   |   |   | X |
| 98  | ERK/MAPK Signaling                                                                                 |   |   |   | X |
| 99  | ERK5 Signaling                                                                                     |   |   |   | X |
| 100 | Erythropoietin Signaling                                                                           |   |   |   | X |
| 101 | Estrogen Receptor Signaling                                                                        |   |   |   | X |
| 102 | Estrogen-Dependent Breast Cancer Signaling                                                         |   |   |   | X |
| 103 | Estrogen-mediated S-phase Entry                                                                    |   |   |   | X |
| 104 | Eumelanin Biosynthesis                                                                             | X |   |   |   |
| 105 | FAK Signaling                                                                                      |   |   |   | X |
| 106 | Fc Epsilon RI Signaling                                                                            |   |   |   | X |
| 107 | Fcy Receptor-mediated Phagocytosis in Macrophages and Monocytes                                    |   |   |   | X |
| 108 | FcyRIIB Signaling in B Lymphocytes                                                                 |   |   |   | X |
| 109 | FGF Signaling                                                                                      |   |   |   | X |
| 110 | FLT3 Signaling in Hematopoietic Progenitor Cells                                                   |   |   |   | X |
| 111 | fMLP Signaling in Neutrophils                                                                      |   |   |   | X |
| 112 | FXR/RXR Activation                                                                                 |   | X |   |   |
| 113 | G Beta Gamma Signaling                                                                             |   |   |   | X |
| 114 | GABA Receptor Signaling                                                                            |   | X |   |   |
| 115 | GABA Receptor Signaling                                                                            |   |   | X |   |
| 116 | GADD45 Signaling                                                                                   |   |   |   | X |
| 117 | Gap Junction Signaling                                                                             |   |   |   | X |
| 118 | GDNF Family Ligand-Receptor Interactions                                                           |   |   |   | X |
| 119 | Germ Cell-Sertoli Cell Junction Signaling                                                          |   |   |   | X |
| 120 | Glioblastoma Multiforme Signaling                                                                  |   |   |   | X |
| 121 | Glioma Invasiveness Signaling                                                                      |   |   | X | X |
| 122 | Glioma Signaling                                                                                   |   |   |   | X |
| 123 | Glucocorticoid Receptor Signaling                                                                  |   |   |   | X |
| 124 | Glutamate Receptor Signaling                                                                       | X | X |   |   |
| 125 | GM-CSF Signaling                                                                                   |   |   |   | X |
| 126 | GNRH Signaling                                                                                     |   |   |   | X |
| 127 | G-Protein Coupled Receptor Signaling                                                               |   | X |   | X |
| 128 | Graft-versus-Host Disease Signaling                                                                |   |   |   | X |
| 129 | Granulocyte Adhesion and Diapedesis                                                                | X |   | X |   |
| 130 | Granzyme A Signaling                                                                               |   |   |   | X |
| 131 | Granzyme B Signaling                                                                               |   |   |   | X |
| 132 | Growth Hormone Signaling                                                                           |   |   |   | X |
| 133 | Gustation Pathway                                                                                  | X |   | X |   |
| 134 | G $\alpha$ 12/13 Signaling                                                                         |   |   |   | X |
| 135 | G $\alpha$ i Signaling                                                                             | X | X |   |   |
| 136 | G $\alpha$ q Signaling                                                                             |   |   |   | X |
| 137 | G $\alpha$ s Signaling                                                                             |   | X |   |   |
| 138 | Hepatic Fibrosis / Hepatic Stellate Cell Activation                                                |   | X | X |   |
| 139 | HER-2 Signaling in Breast Cancer                                                                   |   |   |   | X |
| 140 | Hereditary Breast Cancer Signaling                                                                 |   |   |   | X |
| 141 | HGF Signaling                                                                                      |   |   |   | X |
| 142 | HIF1 $\alpha$ Signaling                                                                            |   |   |   | X |
| 143 | HIPPO signaling                                                                                    |   |   |   | X |
| 144 | HMGB1 Signaling                                                                                    |   |   | X | X |
| 145 | Huntington's Disease Signaling                                                                     |   |   |   | X |
| 146 | Hypoxia Signaling in the Cardiovascular System                                                     |   |   |   | X |
| 147 | iCOS-iCOSL Signaling in T Helper Cells                                                             |   |   |   | X |
| 148 | IGF-1 Signaling                                                                                    |   |   |   | X |
| 149 | IL-1 Signaling                                                                                     |   |   |   | X |
| 150 | IL-10 Signaling                                                                                    |   |   |   | X |
| 151 | IL-12 Signaling and Production in Macrophages                                                      |   |   |   | X |
| 152 | IL-15 Production                                                                                   |   |   |   | X |
| 153 | IL-15 Signaling                                                                                    |   |   |   | X |
| 154 | IL-17 Signaling                                                                                    |   |   |   | X |
| 155 | IL-17A Signaling in Airway Cells                                                                   |   |   |   | X |

|     |                                                                       |   |   |   |   |
|-----|-----------------------------------------------------------------------|---|---|---|---|
| 156 | IL-17A Signaling in Fibroblasts                                       |   |   |   | X |
| 157 | IL-2 Signaling                                                        |   |   |   | X |
| 158 | IL-22 Signaling                                                       |   |   |   | X |
| 159 | IL-3 Signaling                                                        |   |   |   | X |
| 160 | IL-4 Signaling                                                        |   |   |   | X |
| 161 | IL-6 Signaling                                                        |   |   |   | X |
| 162 | IL-8 Signaling                                                        |   |   |   | X |
| 163 | IL-9 Signaling                                                        |   |   |   | X |
| 164 | ILK Signaling                                                         |   |   |   | X |
| 165 | Induction of Apoptosis by HIV1                                        |   |   |   | X |
| 166 | Inhibition of Angiogenesis by TSP1                                    |   |   |   | X |
| 167 | Inhibition of Matrix Metalloproteases                                 |   |   |   | X |
| 168 | iNOS Signaling                                                        |   |   | X | X |
| 169 | Insulin Receptor Signaling                                            |   |   |   | X |
| 170 | Integrin Signaling                                                    |   |   |   | X |
| 171 | Interferon Signaling                                                  |   |   |   | X |
| 172 | JAK/Stat Signaling                                                    |   |   |   | X |
| 173 | Leptin Signaling in Obesity                                           |   |   |   | X |
| 174 | Leukocyte Extravasation Signaling                                     |   |   |   | X |
| 175 | Lipid Antigen Presentation by CD1                                     |   |   |   | X |
| 176 | LPS/L-1 Mediated Inhibition of RXR Function                           |   | X |   | X |
| 177 | LPS-stimulated MAPK Signaling                                         |   |   |   | X |
| 178 | LXR/RXR Activation                                                    |   | X |   | X |
| 179 | Lymphotoxin $\beta$ Receptor Signaling                                |   |   |   | X |
| 180 | Macropinocytosis Signaling                                            |   |   |   | X |
| 181 | Mechanisms of Viral Exit from Host Cells                              |   |   |   | X |
| 182 | Melanocyte Development and Pigmentation Signaling                     |   |   |   | X |
| 183 | Melanoma Signaling                                                    |   |   |   | X |
| 184 | Melatonin Degradation I                                               | X | X |   | X |
| 185 | MIF Regulation of Innate Immunity                                     |   |   |   | X |
| 186 | MIF-mediated Glucocorticoid Regulation                                |   |   |   | X |
| 187 | Mismatch Repair in Eukaryotes                                         |   |   |   | X |
| 188 | Mitochondrial Dysfunction                                             | X |   |   | X |
| 189 | Mitotic Roles of Polo-Like Kinase                                     |   |   |   | X |
| 190 | Molecular Mechanisms of Cancer                                        |   |   |   | X |
| 191 | Mouse Embryonic Stem Cell Pluripotency                                |   |   |   | X |
| 192 | mTOR Signaling                                                        |   |   |   | X |
| 193 | Myc Mediated Apoptosis Signaling                                      |   |   |   | X |
| 194 | Natural Killer Cell Signaling                                         |   |   |   | X |
| 195 | Neuregulin Signaling                                                  |   |   |   | X |
| 196 | Neuropathic Pain Signaling In Dorsal Horn Neurons                     |   | X |   | X |
| 197 | Neurotrophin/TRK Signaling                                            |   |   |   | X |
| 198 | NF- $\kappa$ B Activation by Viruses                                  |   |   |   | X |
| 199 | NF- $\kappa$ B Signaling                                              |   |   |   | X |
| 200 | NGF Signaling                                                         |   |   |   | X |
| 201 | Nicotine Degradation II                                               | X | X |   | X |
| 202 | Nicotine Degradation III                                              | X | X |   | X |
| 203 | nNOS Signaling in Skeletal Muscle Cells                               |   |   | X | X |
| 204 | Non-Small Cell Lung Cancer Signaling                                  |   |   |   | X |
| 205 | NRF2-mediated Oxidative Stress Response                               |   |   |   | X |
| 206 | Nucleotide Excision Repair Pathway                                    |   |   |   | X |
| 207 | Nur77 Signaling in T Lymphocytes                                      |   |   |   | X |
| 208 | Oncostatin M Signaling                                                |   |   |   | X |
| 209 | Ovarian Cancer Signaling                                              |   |   |   | X |
| 210 | Oxidative Phosphorylation                                             | X |   |   | X |
| 211 | P2Y Purigenic Receptor Signaling Pathway                              |   |   |   | X |
| 212 | p38 MAPK Signaling                                                    |   |   |   | X |
| 213 | p53 Signaling                                                         |   |   |   | X |
| 214 | p70S6K Signaling                                                      |   |   |   | X |
| 215 | PAK Signaling                                                         |   |   |   | X |
| 216 | Pancreatic Adenocarcinoma Signaling                                   |   |   |   | X |
| 217 | Paxillin Signaling                                                    |   |   |   | X |
| 218 | PDGF Signaling                                                        |   |   |   | X |
| 219 | PEDF Signaling                                                        |   |   |   | X |
| 220 | phagosome formation                                                   |   |   |   | X |
| 221 | phagosome maturation                                                  |   |   |   | X |
| 222 | Phospholipase C Signaling                                             |   |   |   | X |
| 223 | PI3K Signaling in B Lymphocytes                                       |   |   |   | X |
| 224 | PI3K/AKT Signaling                                                    |   |   |   | X |
| 225 | PKC $\theta$ Signaling in T Lymphocytes                               |   |   |   | X |
| 226 | Polyamine Regulation in Colon Cancer                                  |   |   |   | X |
| 227 | PPAR Signaling                                                        |   |   |   | X |
| 228 | PPAR $\alpha$ /RXR $\alpha$ Activation                                |   |   |   | X |
| 229 | Primary Immunodeficiency Signaling                                    |   |   |   | X |
| 230 | Production of Nitric Oxide and Reactive Oxygen Species in Macrophages |   |   | X | X |
| 231 | Prolactin Signaling                                                   |   |   |   | X |
| 232 | Prostate Cancer Signaling                                             |   |   |   | X |
| 233 | Protein Kinase A Signaling                                            |   |   |   | X |
| 234 | Protein Ubiquitination Pathway                                        |   |   |   | X |

|     |                                                                                |   |   |   |   |
|-----|--------------------------------------------------------------------------------|---|---|---|---|
| 235 | PTEN Signaling                                                                 |   |   |   | X |
| 236 | Pyridoxal 5'-phosphate Salvage Pathway                                         |   |   |   | X |
| 237 | Rac Signaling                                                                  |   |   |   | X |
| 238 | RAN Signaling                                                                  |   |   |   | X |
| 239 | RANK Signaling in Osteoclasts                                                  |   |   |   | X |
| 240 | RAR Activation                                                                 |   |   |   | X |
| 241 | Reelin Signaling in Neurons                                                    |   |   |   | X |
| 242 | Regulation of Actin-based Motility by Rho                                      |   |   |   | X |
| 243 | Regulation of Cellular Mechanics by Calpain Protease                           |   |   |   | X |
| 244 | Regulation of eIF4 and p70S6K Signaling                                        |   |   |   | X |
| 245 | Regulation of IL-2 Expression in Activated and Anergic T Lymphocytes           |   |   |   | X |
| 246 | Regulation of the Epithelial-Mesenchymal Transition Pathway                    |   |   |   | X |
| 247 | Relaxin Signaling                                                              |   |   |   | X |
| 248 | Remodeling of Epithelial Adherens Junctions                                    |   |   |   | X |
| 249 | Renal Cell Carcinoma Signaling                                                 |   |   |   | X |
| 250 | Renin-Angiotensin Signaling                                                    |   |   |   | X |
| 251 | Retinoic acid Mediated Apoptosis Signaling                                     |   |   |   | X |
| 252 | RhoGDI Signaling                                                               |   |   |   | X |
| 253 | Role of BRCA1 in DNA Damage Response                                           |   |   |   | X |
| 254 | Role of CHK Proteins in Cell Cycle Checkpoint Control                          |   |   |   | X |
| 255 | Role of IL-17A in Arthritis                                                    |   |   |   | X |
| 256 | Role of JAK family kinases in IL-6-type Cytokine Signaling                     |   |   |   | X |
| 257 | Role of JAK1 and JAK3 in $\gamma$ c Cytokine Signaling                         |   |   |   | X |
| 258 | Role of JAK1, JAK2 and TYK2 in Interferon Signaling                            |   |   |   | X |
| 259 | Role of Macrophages, Fibroblasts and Endothelial Cells in Rheumatoid Arthritis |   |   |   | X |
| 260 | Role of MAPK Signaling in the Pathogenesis of Influenza                        |   |   |   | X |
| 261 | Role of NANOG in Mammalian Embryonic Stem Cell Pluripotency                    |   |   |   | X |
| 262 | Role of NFAT in Cardiac Hypertrophy                                            |   |   |   | X |
| 263 | Role of NFAT in Regulation of the Immune Response                              |   |   |   | X |
| 264 | Role of Oct4 in Mammalian Embryonic Stem Cell Pluripotency                     |   |   |   | X |
| 265 | Role of p14/p19ARF in Tumor Suppression                                        |   |   |   | X |
| 266 | Role of PI3K/AKT Signaling in the Pathogenesis of Influenza                    |   |   |   | X |
| 267 | Role of PKR in Interferon Induction and Antiviral Response                     |   |   |   | X |
| 268 | Role of RIG1-like Receptors in Antiviral Innate Immunity                       |   |   |   | X |
| 269 | Role of Tissue Factor in Cancer                                                |   |   |   | X |
| 270 | Salvage Pathways of Pyrimidine Ribonucleotides                                 |   |   |   | X |
| 271 | SAPK/JNK Signaling                                                             |   |   |   | X |
| 272 | Semaphorin Signaling in Neurons                                                |   |   | X | X |
| 273 | Signaling by Rho Family GTPases                                                |   |   |   | X |
| 274 | Small Cell Lung Cancer Signaling                                               |   |   |   | X |
| 275 | Sperm Motility                                                                 |   | X |   |   |
| 276 | Sphingosine-1-phosphate Signaling                                              |   |   |   | X |
| 277 | STAT3 Pathway                                                                  |   |   |   | X |
| 278 | Superpathway of Inositol Phosphate Compounds                                   |   |   |   | X |
| 279 | Superpathway of Melatonin Degradation                                          | X |   |   |   |
| 280 | Synaptic Long Term Depression                                                  |   | X |   | X |
| 281 | Synaptic Long Term Potentiation                                                |   |   |   | X |
| 282 | Systemic Lupus Erythematosus Signaling                                         |   |   |   | X |
| 283 | T Cell Receptor Signaling                                                      |   |   |   | X |
| 284 | T Helper Cell Differentiation                                                  |   |   |   | X |
| 285 | Tec Kinase Signaling                                                           |   |   |   | X |
| 286 | Telomerase Signaling                                                           |   |   |   | X |
| 287 | Telomere Extension by Telomerase                                               |   |   |   | X |
| 288 | TGF- $\beta$ Signaling                                                         |   |   | X | X |
| 289 | Thrombin Signaling                                                             |   |   |   | X |
| 290 | Thrombopoietin Signaling                                                       |   |   |   | X |
| 291 | Tight Junction Signaling                                                       |   |   |   | X |
| 292 | TNFR1 Signaling                                                                |   |   |   | X |
| 293 | TNFR2 Signaling                                                                |   |   |   | X |
| 294 | Transcriptional Regulatory Network in Embryonic Stem Cells                     |   | X |   |   |
| 295 | TREM1 Signaling                                                                |   |   |   | X |
| 296 | Tumoricidal Function of Hepatic Natural Killer Cells                           |   |   |   | X |
| 297 | TWEAK Signaling                                                                |   |   |   | X |
| 298 | Type I Diabetes Mellitus Signaling                                             |   |   |   | X |
| 299 | Type II Diabetes Mellitus Signaling                                            |   |   |   | X |
| 300 | Unfolded protein response                                                      |   |   | X |   |
| 301 | Unfolded protein response                                                      |   |   |   | X |
| 302 | UVA-Induced MAPK Signaling                                                     |   |   |   | X |
| 303 | UVB-Induced MAPK Signaling                                                     |   |   |   | X |
| 304 | UVC-Induced MAPK Signaling                                                     |   |   |   | X |
| 305 | VEGF Family Ligand-Receptor Interactions                                       |   |   |   | X |
| 306 | VEGF Signaling                                                                 |   |   |   | X |
| 307 | Virus Entry via Endocytic Pathways                                             |   |   |   | X |
| 308 | Wnt/ $\beta$ -catenin Signaling                                                |   |   |   | X |
| 309 | Xenobiotic Metabolism Signaling                                                |   |   |   | X |
| 310 | $\alpha$ -Adrenergic Signaling                                                 |   |   |   | X |
